# Supplementary material for: Expression of a Neuroendocrine Gene Signature in Gastric Tumor Cells from CEA 424-SV40 Large T Antigen-Transgenic Mice Depends on SV40 Large T Antigen
Source: PubMed Central journal article supplement (PMC3258231; doi:10.1371/journal.pone.0029846), 2012-01-13
Supplement: pone.0029846.s002.pdf [file pone.0029846.s002.pdf]

**Table S1: Genes upregulated in the antrum of 90-day-old CEA424 -SV40 TAg mice in comparison to the antrum of non-transgenic littermates**

| Gene <sup>1</sup> | Description                                                                                                                         | Probe set                                   | Fluorescence<br>d90 tumor | Fold change | P value <sup>2</sup> |
|-------------------|-------------------------------------------------------------------------------------------------------------------------------------|---------------------------------------------|---------------------------|-------------|----------------------|
| <b>Chgb</b>       | chromogranin B (Chgb), mRNA.                                                                                                        | scl20253.5_8-S                              | 25374                     | 192.3       | <b>0.012</b>         |
| <b>Tph1</b>       | tryptophan hydroxylase 1 (Tph1), mRNA.                                                                                              | scl31346.12.1_18-S                          | 5582                      | 146.1       | <b>0.010</b>         |
| <b>Calca</b>      | calcitonin/calcitonin-related polypeptide, alpha (Calca), mRNA.                                                                     | scl0012310.2_237-S                          | 2082                      | 113.9       | 0.063                |
| <b>Gcg</b>        | glucagon (Gcg), mRNA.                                                                                                               | scl19223.5.1_16-S                           | 6607                      | 110.9       | <b>0.007</b>         |
| <b>Scg2</b>       | secretogranin II (Scg2), mRNA.                                                                                                      | scl0020254.2_71-S                           | 8695                      | 110.6       | <b>0.014</b>         |
| <b>Dlk1</b>       | delta-like 1 homolog (Drosophila) (Dlk1), mRNA.                                                                                     | scl42790.6_48-S                             | 5917                      | 87.8        | <b>0.000</b>         |
| <b>Sbp</b>        | spermine binding protein (Sbp), mRNA.                                                                                               | scl50224.3.1_12-S                           | 1747                      | 74.9        | 0.052                |
| <b>Sct</b>        | secretin (Sct), mRNA.                                                                                                               | scl30493.4.19_120-S                         | 26665                     | 68.9        | <b>0.040</b>         |
| <b>Grp</b>        | gastrin releasing peptide (Grp), mRNA.                                                                                              | scl51842.4.1_165-S                          | 1785                      | 49.7        | <b>0.013</b>         |
| <b>Pappa2</b>     | 9430076M13                                                                                                                          | scl00329275.1_98-S                          | 2330                      | 47.2        | <b>0.038</b>         |
| <b>Calca</b>      | calcitonin/calcitonin-related polypeptide, alpha (Calca), mRNA.                                                                     | scl30784.6.1_78-S                           | 1327                      | 46.3        | 0.091                |
| 1810009J06Rik     | RIKEN cDNA 1810009J06 gene (1810009J06Rik), mRNA.                                                                                   | scl30151.5.1_76-S                           | 6914                      | 44.6        | 0.255                |
| <b>Gad2</b>       | glutamic acid decarboxylase 2 (6330404F12Rik), mRNA                                                                                 | scl21216.1.1627_35-S                        | 1352                      | 42.8        | <b>0.022</b>         |
| <b>Hap1</b>       | huntingtin-associated protein 1 (Hap1), transcript variant 1, mRNA.                                                                 | scl39565.12_79-S                            | 4465                      | 40.2        | <b>0.015</b>         |
| <b>Syt4</b>       | synaptotagmin 4 (Syt4), mRNA.                                                                                                       | scl0020983.2_127-S                          | 1457                      | 38.6        | <b>0.010</b>         |
| <b>Nt5dc2</b>     | 5'-nucleotidase domain containing 2 (2510015F01Rik), mRNA                                                                           | ri 2510015F01 ZX00047N<br>14 AK010966 669-S | 4741                      | 37.0        | <b>0.018</b>         |
| <b>Igh-1a</b>     |                                                                                                                                     | scl0380793.1_210-S                          | 2115                      | 36.7        | <b>0.048</b>         |
| <b>Dlk1</b>       | delta-like 1 homolog (Drosophila) (Dlk1), mRNA.                                                                                     | scl0013386.2_11-S                           | 2164                      | 35.9        | <b>0.006</b>         |
| <b>Miat</b>       | myocardial infarction associated transcript (non-protein coding) (A230057G18Rik)                                                    | scl26213.1.3_304-S                          | 1058                      | 35.6        | 0.073                |
| 2310051P22Rik     |                                                                                                                                     | ri 2310051P22 ZX00059F<br>14 AK075905 599-S | 2416                      | 32.6        | 0.080                |
| <b>Snap25</b>     | synaptosomal-associated protein 25 (Snap25), mRNA.                                                                                  | scl20231.9_372-S                            | 4661                      | 29.3        | <b>0.027</b>         |
| <b>Sgne1/Scg5</b> | secretory granule neuroendocrine protein 1, 7B2 protein (Sgne1), mRNA.                                                              | scl18858.8.1_25-S                           | 3446                      | 29.3        | <b>0.033</b>         |
| <b>Pdyn</b>       | prodynorphin (Pdyn), mRNA.                                                                                                          | scl18671.5_48-S                             | 2589                      | 29.0        | <b>0.004</b>         |
| <b>Amigo2</b>     | adhesion molecule with Ig like domain 2 (AI415330), mRNA.                                                                           | scl46785.2.1_0-S                            | 1969                      | 28.2        | <b>0.044</b>         |
| <b>Kndc1</b>      | kinase non-catalytic C-lobe domain (KIND) containing 1 (2410012C07Rik), mRNA.                                                       | scl076484.1_294-S                           | 941                       | 27.8        | <b>0.038</b>         |
| <b>Resp18</b>     | regulated endocrine-specific protein 18 (Resp18), mRNA.                                                                             | scl16596.6.1_82-S                           | 12005                     | 27.5        | <b>0.017</b>         |
| <b>Thy1</b>       | thymus cell antigen 1, theta (Thy1), mRNA.                                                                                          | scl37046.4_393-S                            | 3803                      | 27.2        | <b>0.000</b>         |
| <b>Nptx2</b>      | neuronal pentraxin 2 (Nptx2), mRNA.                                                                                                 | scl26994.6.1_84-S                           | 938                       | 27.1        | <b>0.001</b>         |
| <b>Amigo2</b>     | adhesion molecule with Ig like domain 2 (AI415330), mRNA.                                                                           | scl00105827.2_285-S                         | 3032                      | 26.5        | <b>0.045</b>         |
| <b>Nt5dc2</b>     | 5'-nucleotidase domain containing 2 (2510015F01Rik), mRNA                                                                           | scl46497.11.10_2-S                          | 940                       | 25.7        | <b>0.003</b>         |
| <b>Rufy3</b>      | RUN and FYVE domain containing 3 (D5Bwg0860e), mRNA.                                                                                | scl0052822.2_239-S                          | 758                       | 25.5        | <b>0.026</b>         |
| <b>Wif1</b>       | Wnt inhibitory factor 1 (Wif1), mRNA.                                                                                               | scl38368.11_94-S                            | 970                       | 25.1        | <b>0.015</b>         |
| B930041J05        | 10 days neonate cerebellum cDNA, RIKEN full-length enriched library, clone:B930041J05 product:unclassifiable, full insert sequence. | scl0003318.1_26-S                           | 953                       | 24.1        | <b>0.029</b>         |

|              |                                                                                            |                                                   |      |      |              |
|--------------|--------------------------------------------------------------------------------------------|---------------------------------------------------|------|------|--------------|
| Igh-4        |                                                                                            | scl0016017.1_1-S                                  | 497  | 23.2 | 0.076        |
| Stk32a       | serine/threonine kinase 32A                                                                | scl52018.13_498-S                                 | 943  | 22.4 | <b>0.030</b> |
| Cck          | cholecystokinin (Cck), mRNA.                                                               | scl35202.5.1_0-S                                  | 823  | 21.2 | <b>0.024</b> |
| Nkx2-2       | NK2 transcription factor related, locus 2 (Drosophila) (Nkx2-2), mRNA.                     | scl0018088.2_84-S                                 | 490  | 21.1 | <b>0.010</b> |
| Trp7         | transient receptor protein 7                                                               | ri 9830168K16 PX00119C<br>18 AK036731 3991-S      | 573  | 21.0 | <b>0.040</b> |
| Mdm1         | transformed mouse 3T3 cell double minute 1 (Mdm1), mRNA.                                   | scl38394.14.1_0-S                                 | 957  | 20.9 | 0.068        |
| Cryba2       | crystallin, beta A2 (Cryba2), mRNA.                                                        | scl16609.5.1_17-S                                 | 1272 | 20.5 | <b>0.017</b> |
| Insm1        | insulinoma-associated 1 (Insm1), mRNA.                                                     | scl20175.1.1_43-S                                 | 1037 | 20.4 | <b>0.000</b> |
| Dner         | delta/notch-like EGF-related receptor (Dner), mRNA.                                        | scl16535.14_269-S                                 | 1491 | 20.1 | <b>0.025</b> |
| Sphk1        | SPHK1 interactor, AKAP domain containing (4930544G21Rik), mRNA.                            | scl16544.13_20-S                                  | 824  | 19.6 | <b>0.028</b> |
| Eef1a2       | eukaryotic translation elongation factor 1 alpha 2 (Eef1a2), mRNA.                         | scl013628.1_321-S                                 | 2752 | 19.6 | <b>0.004</b> |
| Tmem27       | transmembrane protein 27                                                                   | scl54490.7_1-S                                    | 603  | 19.6 | <b>0.049</b> |
| Ighg2c       | immunoglobulin heavy constant gamma 2C                                                     | IGHG2C_J00479_Ig_heavy<br>constant_gamma_2C_715-S | 669  | 19.0 | 0.058        |
| Mdm1         | transformed mouse 3T3 cell double minute 1 (Mdm1), mRNA.                                   | scl0003883.1_511-S                                | 700  | 18.9 | 0.074        |
| Siat8e       | sialyltransferase 8 (alpha-2, 8-sialyltransferase) E (Siat8e), transcript variant 2, mRNA. | scl51743.8.1_178-S                                | 436  | 18.9 | <b>0.007</b> |
| Pcsk2        | proprotein convertase subtilisin/kexin type 2 (Pcsk2), mRNA.                               | scl018549.12_191-S                                | 1547 | 18.8 | <b>0.013</b> |
| Plk5         | polo-like kinase 5 (Drosophila) (6330514A18Rik), mRNA.                                     | scl38681.14.1_267-S                               | 831  | 18.3 | <b>0.041</b> |
| Nov          | nephroblastoma overexpressed gene (Nov), mRNA.                                             | scl47911.5_100-S                                  | 538  | 18.2 | <b>0.021</b> |
| Serpina3n    | serine (or cysteine) proteinase inhibitor, clade A, member 3N (Serpina3n), mRNA.           | scl020716.5_261-S                                 | 4118 | 17.9 | <b>0.039</b> |
| Wisp2        | WNT1 inducible signaling pathway protein 2 (Wisp2), mRNA.                                  | scl19952.5.1_24-S                                 | 504  | 17.8 | <b>0.001</b> |
| B3gat1       | beta-1,3-glucuronyltransferase 1 (glucuronosyltransferase P) (B3gat1), mRNA.               | scl0076898.1_65-S                                 | 435  | 17.3 | <b>0.011</b> |
| Etv1         | ets variant gene 1 (Etv1), mRNA.                                                           | scl014009.13_0-S                                  | 2437 | 17.3 | <b>0.014</b> |
| Spc25        | SPC25, NDC80 kinetochore complex component, homolog (S. cerevisiae) (2600017H08Rik), mRNA. | scl19174.6.1_6-S                                  | 2097 | 17.2 | <b>0.016</b> |
| Celsr3       | cadherin EGF LAG seven-pass G-type receptor 3 (Celsr3), mRNA.                              | scl0107934.22_249-S                               | 561  | 16.9 | <b>0.013</b> |
| Gprasp2      | G protein-coupled receptor associated sorting protein 2                                    | scl54621.6_157-S                                  | 1260 | 16.6 | <b>0.032</b> |
| Asphd1       | aspartate beta-hydroxylase domain containing 1 (A830007L07Rik), mRNA.                      | scl30664.4.1_54-S                                 | 338  | 16.5 | <b>0.010</b> |
| Bruno4       | bruno-like 4, RNA binding protein (Drosophila) (Bruno4), mRNA.                             | scl51577.15_266-S                                 | 2781 | 16.4 | <b>0.026</b> |
| Dscam        | Down syndrome cell adhesion molecule (Dscam), mRNA.                                        | scl0013508.1_59-S                                 | 321  | 16.3 | <b>0.030</b> |
| Nxph1        | neurexophilin 1 (Nxph1), mRNA.                                                             | scl30391.3_48-S                                   | 681  | 16.3 | <b>0.033</b> |
| Bex2         | brain expressed X-linked 2 (Bex2), mRNA.                                                   | scl53819.3_141-S                                  | 5535 | 16.0 | <b>0.005</b> |
| <b>Sv2a</b>  | synaptic vesicle glycoprotein 2 a (Sv2a), mRNA.                                            | scl064051.13_189-S                                | 712  | 15.9 | <b>0.015</b> |
| Lrp11        | low density lipoprotein receptor-related protein 11 (Lrp11), mRNA.                         | scl39172.7_550-S                                  | 1349 | 15.9 | <b>0.014</b> |
| Pak3         | p21 (CDKN1A)-activated kinase 3 (Pak3), mRNA.                                              | scl018481.14_0-S                                  | 1068 | 15.9 | <b>0.013</b> |
| Zcchc18      | zinc finger, CCHC domain containing 18 (1500031H04Rik), mRNA.                              | scl54605.3_321-S                                  | 1448 | 15.9 | <b>0.018</b> |
| <b>Gria2</b> | glutamate receptor, ionotropic, AMPA2 (alpha 2) (Gria2), mRNA.                             | scl0014800.2_192-S                                | 842  | 15.7 | <b>0.028</b> |
| <b>Chga</b>  | chromogranin A (Chga), mRNA.                                                               | scl42855.7.114_47-S                               | 5147 | 15.6 | <b>0.013</b> |

|               |                                                                                                                           |                                                    |      |      |              |
|---------------|---------------------------------------------------------------------------------------------------------------------------|----------------------------------------------------|------|------|--------------|
| Rit2          | Ras-like without CAAX 2 (Rit2), mRNA.                                                                                     | scl0019762.2_135-S                                 | 1075 | 14.9 | <b>0.016</b> |
| AI427515      | expressed sequence AI427515 (AI427515), mRNA.                                                                             | scl33299.10_656-S                                  | 1237 | 14.5 | <b>0.012</b> |
| Snhg11        | small nucleolar RNA host gene 11 (E130013N09Rik), mRNA                                                                    | scl20000.1_138-S                                   | 824  | 14.5 | <b>0.025</b> |
| Ighg1         | immunoglobulin heavy constant gamma 1                                                                                     | IGHG1_J00453\$V00793_ig_heavy_constant_gamma_1_792 | 346  | 14.5 | 0.068        |
| Entpd3        | ectonucleoside triphosphate diphosphohydrolase 3 (Entpd3), mRNA.                                                          | scl36335.20.967_4-S                                | 2446 | 14.5 | 0.070        |
| C130036G08    | hypothetical protein C130036G08 (C130036G08), mRNA.                                                                       | scl25790.8_644-S                                   | 653  | 14.3 | <b>0.018</b> |
| Slc35d3       | solute carrier family 35, member D3                                                                                       | scl38150.2.1_277-S                                 | 530  | 14.1 | <b>0.012</b> |
| <b>Ddc</b>    | dopa decarboxylase (Ddc), mRNA.                                                                                           | scl40512.21.1_20-S                                 | 3022 | 14.1 | <b>0.002</b> |
| Gap43         | growth associated protein 43 (Gap43), mRNA.                                                                               | scl014432.1_11-S                                   | 854  | 13.9 | <b>0.015</b> |
| C630025L14    | hypothetical protein C630025L14 (C630025L14), mRNA.                                                                       | scl00210980.1_280-S                                | 547  | 13.9 | <b>0.013</b> |
| Mfng          | manic fringe homolog (Drosophila) (Mfng), mRNA.                                                                           | scl46983.8_85-S                                    | 914  | 13.8 | <b>0.010</b> |
| <b>Syt1</b>   | synaptotagmin 1 (Syt1), mRNA.                                                                                             | scl37517.13_240-S                                  | 762  | 13.8 | <b>0.030</b> |
| Trpc4         | transient receptor potential cation channel, subfamily C, member 4 (Trpc4), mRNA.                                         | scl23196.13.253_8-S                                | 489  | 13.4 | <b>0.018</b> |
| Pacsin1       | protein kinase C and casein kinase substrate in neurons 1 (Pacsin1), mRNA.                                                | scl0023969.1_255-S                                 | 530  | 13.3 | <b>0.015</b> |
| Saa3          | serum amyloid A 3 (Saa3), mRNA.                                                                                           | scl31343.5.1_35-S                                  | 944  | 13.3 | 0.123        |
| A2bp1         | ataxin 2 binding protein 1 (A2bp1), transcript variant 2, mRNA.                                                           | scl0268859.12_21-S                                 | 482  | 13.2 | <b>0.025</b> |
| Stxbp1        | syntaxin binding protein 1 (Stxbp1), mRNA.                                                                                | scl020910.1_1-S                                    | 3019 | 13.1 | <b>0.015</b> |
| Sez6l         | seizure related 6 homolog like                                                                                            | scl26208.17_33-S                                   | 410  | 13.0 | 0.079        |
| Tro           | trophinin (Tro), mRNA.                                                                                                    | scl53734.13.1_1-S                                  | 879  | 13.0 | <b>0.032</b> |
| Gm691         | gene model 691, (NCBI) (Gm691), mRNA.                                                                                     | scl0277432.5_328-S                                 | 1095 | 12.9 | <b>0.017</b> |
| <b>Ddc</b>    | dopa decarboxylase (Ddc), mRNA.                                                                                           | scl0013195.2_156-S                                 | 2551 | 12.7 | <b>0.004</b> |
| 2700016F22Rik | RIKEN cDNA 2700016F22 gene                                                                                                | scl2206.1.1_322-S                                  | 619  | 12.6 | 0.112        |
| <b>Gabrb3</b> | gamma-aminobutyric acid (GABA-A) receptor, subunit beta 3 (Gabrb3), mRNA.                                                 | scl32600.10_229-S                                  | 898  | 12.5 | <b>0.027</b> |
| Chst1         | carbohydrate (keratan sulfate Gal-6) sulfotransferase 1 (Chst1), mRNA.                                                    | scl076969.2_187-S                                  | 1782 | 12.5 | <b>0.010</b> |
| Ighg          | Immunoglobulin heavy chain (gamma polypeptide) (AU044919)                                                                 | scl0380794.2_30-S                                  | 451  | 12.3 | 0.100        |
| Ptprn         | protein tyrosine phosphatase, receptor type, N (Ptprn), mRNA.                                                             | scl16598.23.1_93-S                                 | 531  | 12.2 | <b>0.007</b> |
| 3110018K01    | 13 days embryo head cDNA, RIKEN full-length enriched library, clone:3110018K01 product:unknown EST, full insert sequence. | scl0002540.1_6-S                                   | 465  | 12.2 | <b>0.012</b> |
| Prss12        | protease, serine, 12 neurotrypsin (motopsin) (Prss12), mRNA.                                                              | scl22657.12.1_29-S                                 | 548  | 12.1 | <b>0.018</b> |
| Rgs9          | regulator of G-protein signaling 9 (Rgs9), mRNA.                                                                          | scl39397.22.1_286-S                                | 886  | 11.9 | <b>0.022</b> |
| Peg3          | paternally expressed 3 (Peg3), mRNA.                                                                                      | scl018616.1_273-S                                  | 851  | 11.9 | 0.077        |
| <b>Chga</b>   | chromogranin A (Chga), mRNA.                                                                                              | scl0002400.1_38-S                                  | 3278 | 11.8 | <b>0.025</b> |
| Tagln3        | transgelin 3 (Tagln3), mRNA.                                                                                              | scl48442.3.1_5-S                                   | 518  | 11.8 | <b>0.010</b> |
| <b>Eno2</b>   | enolase 2, gamma neuronal (Eno2), mRNA.                                                                                   | scl013807.1_30-S                                   | 1170 | 11.5 | <b>0.019</b> |
| Csen          | calsenilin, presenilin binding protein, EF hand transcription factor (Csen), mRNA.                                        | scl18706.10.1_133-S                                | 366  | 11.5 | <b>0.009</b> |
| Hp            | haptoglobin (Hp), mRNA.                                                                                                   | scl34345.7_19-S                                    | 1096 | 11.5 | 0.077        |
| 2700045K19Rik |                                                                                                                           | ri 2700045K19 ZX00056N06 AK012378 949-S            | 456  | 11.4 | <b>0.024</b> |
| Fam183b       | family with sequence similarity 183, member B (Fam183b), mRNA                                                             | scl40179.4.1_10-S                                  | 939  | 11.4 | 0.054        |

|               |                                                                               |                     |      |      |              |
|---------------|-------------------------------------------------------------------------------|---------------------|------|------|--------------|
| Pcsk2         | proprotein convertase subtilisin/kexin type 2 (Pcsk2), mRNA.                  | scl20208.12.1_29-S  | 621  | 11.4 | <b>0.004</b> |
| Trim9         | tripartite motif-containing 9 (Trim9), mRNA                                   | scl0002358.1_1625-S | 248  | 11.3 | <b>0.026</b> |
| <b>Gria2</b>  | glutamate receptor, ionotropic, AMPA2 (alpha 2) (Gria2), mRNA.                | scl22034.13_42-S    | 413  | 11.3 | 0.089        |
| AW121567      | expressed sequence AW121567 (AW121567), mRNA.                                 | scl35118.3_474-S    | 623  | 11.3 | <b>0.034</b> |
| Crtac1        | cartilage acidic protein 1 (Crtac1), mRNA.                                    | scl52473.16_34-S    | 314  | 11.2 | <b>0.000</b> |
| E430021N18Rik | RIKEN cDNA E430021N18 gene (E430021N18Rik), mRNA.                             | scl17113.9_435-S    | 405  | 11.1 | <b>0.037</b> |
| <b>Syp</b>    | synaptophysin (Syp), mRNA.                                                    | scl020977.7_194-S   | 2030 | 11.1 | <b>0.013</b> |
| Stmn3         | stathmin-like 3 (Stmn3), mRNA.                                                | scl020262.2_8-S     | 589  | 10.9 | <b>0.014</b> |
| AV344025      | expressed sequence AV344025 (AV344025), mRNA.                                 | scl49565.1.1_305-S  | 367  | 10.9 | <b>0.020</b> |
| C1qtnf4       | C1q and tumor necrosis factor related protein 4 (C1qtnf4), mRNA.              | scl20653.2_227-S    | 1024 | 10.8 | <b>0.015</b> |
| Elavl3        | ELAV (embryonic lethal, abnormal vision, Drosophila)-like 3 (Hu antigen C)    | scl066572.1_0-S     | 424  | 10.8 | <b>0.013</b> |
| 2900063K03Rik | RIKEN cDNA 2900063K03 gene                                                    | scl26306.1.1_82-S   | 496  | 10.6 | 0.144        |
| Pcsk1n        | proprotein convertase subtilisin/kexin type 1 inhibitor (Pcsk1n), mRNA.       | scl0030052.2_159-S  | 930  | 10.6 | <b>0.016</b> |
| St18          | suppression of tumorigenicity 18 (St18), mRNA.                                | scl18181.27.1_309-S | 470  | 10.4 | <b>0.014</b> |
| Rgag4         | retrotransposon gag domain containing 4                                       | scl53982.1_257-S    | 363  | 10.4 | <b>0.022</b> |
| Thbs2         | thrombospondin 2 (Thbs2), mRNA.                                               | scl0021826.1_238-S  | 913  | 10.4 | <b>0.023</b> |
| Trim35        | tripartite motif-containing 35 (Trim35), mRNA.                                | scl46157.6_151-S    | 339  | 10.3 | <b>0.046</b> |
| Ddx25         | DEAD (Asp-Glu-Ala-Asp) box polypeptide 25 (Ddx25), mRNA.                      | scl36044.11.1_77-S  | 398  | 10.1 | <b>0.029</b> |
| A930011O12Rik | RIKEN cDNA A930011O12 gene                                                    | scl46184.5_151-S    | 240  | 10.1 | 0.069        |
| 6430402H13Rik | RIKEN cDNA 6430402H13 gene (6430402H13Rik), mRNA.                             | scl0378937.1_229-S  | 396  | 10.1 | <b>0.007</b> |
| Camk2n2       | calcium/calmodulin-dependent protein kinase II inhibitor 2                    | scl48661.2.1_28-S   | 2245 | 10.0 | <b>0.029</b> |
| Tro           | trophinin (Tro), mRNA.                                                        | scl0056191.2_129-S  | 503  | 10.0 | <b>0.022</b> |
| Galr1         | galanin receptor 1 (Galr1), mRNA.                                             | scl51205.4.8_60-S   | 197  | 9.9  | <b>0.041</b> |
| Sult4a1       | sulfotransferase family 4A, member 1 (Sult4a1), mRNA.                         | scl46888.9_276-S    | 780  | 9.8  | <b>0.007</b> |
| Gprin1        | G protein-regulated inducer of neurite outgrowth 1 (Gprin1), mRNA.            | scl026913.1_318-S   | 461  | 9.7  | <b>0.003</b> |
| Spock1        | sparc/osteonectin, cwcw and kazal-like domains proteoglycan 1 (Spock1), mRNA. | scl0020745.1_153-S  | 406  | 9.7  | <b>0.012</b> |
| Spock2        | sparc/osteonectin, cwcw and kazal-like domains proteoglycan 2                 | scl0014480.1_16-S   | 199  | 9.7  | <b>0.028</b> |
| Inpp5f        | inositol polyphosphate-5-phosphatase F (Inpp5f), mRNA.                        | scl31997.22_366-S   | 2277 | 9.5  | <b>0.027</b> |
| Olfml3        | olfactomedin-like 3                                                           | scl21737.4_335-S    | 1734 | 9.5  | <b>0.016</b> |
| <b>Syn1</b>   | synapsin I (Syn1), mRNA.                                                      | scl0020964.1_0-S    | 416  | 9.5  | <b>0.012</b> |
| <b>Nsg2</b>   | neuron specific gene family member 2 (Nsg2), mRNA.                            | scl41730.11_1-S     | 356  | 9.5  | <b>0.006</b> |
| 4931429I11Rik | RIKEN cDNA 4931429I11 gene (4931429I11Rik), mRNA.                             | scl0003510.1_178-S  | 261  | 9.4  | <b>0.030</b> |
| <b>Calcr</b>  | calcitonin receptor (Calcr), mRNA.                                            | scl29325.17.1_48-S  | 279  | 9.4  | <b>0.009</b> |
| Ndr4          | N-myc downstream regulated gene 4 (Ndr4), mRNA                                | scl0234593.14_96-S  | 1092 | 9.4  | <b>0.028</b> |
| Cntnap4       | contactin associated protein 4 (Cntnap4), mRNA.                               | scl33308.26.1_5-S   | 503  | 9.2  | <b>0.020</b> |
| Iqsec3        | IQ motif and Sec7 domain 3 (Iqsec3), mRNA                                     | scl28446.23_488-S   | 312  | 9.2  | <b>0.029</b> |
| Cplx1         | complexin 1 (Cplx1), mRNA.                                                    | scl26249.4_662-S    | 535  | 9.1  | <b>0.007</b> |
| Olfm1         | olfactomedin 1 (Olfm1), mRNA.                                                 | scl0003187.1_40-S   | 1567 | 9.1  | <b>0.012</b> |
| Dusp4         | dual specificity phosphatase 4 (Dusp4), mRNA.                                 | scl279.1.1_54-S     | 968  | 9.1  | <b>0.009</b> |
| S100a8        | S100 calcium binding protein A8 (calgranulin A) (S100a8), mRNA.               | scl22940.2.1_25-S   | 579  | 9.0  | 0.221        |
| Mdm1          | transformed mouse 3T3 cell double minute 1 (Mdm1), mRNA.                      | scl0003918.1_84-S   | 163  | 8.9  | <b>0.042</b> |

|               |                                                                                     |                       |      |     |              |
|---------------|-------------------------------------------------------------------------------------|-----------------------|------|-----|--------------|
| Otud7a        | OTU domain containing 7A (Otud7a), mRNA                                             | scl32590.14.1_290-S   | 259  | 8.9 | <b>0.027</b> |
| Kcnc4         | potassium voltage gated channel, Shaw-related subfamily, member 4 (Kcnc4)           | scl21680.4_681-S      | 441  | 8.9 | <b>0.022</b> |
| Tmem59l       | transmembrane protein 59-like (Tmem59l), mRNA                                       | scl34700.7.1_46-S     | 274  | 8.9 | <b>0.006</b> |
| LOC381283     | hypothetical gene supported by AK083095 (LOC381283), mRNA.                          | GI_38050350-S         | 1894 | 8.9 | <b>0.026</b> |
| 4930488B01Rik |                                                                                     | scl33036.2.115_8-S    | 335  | 8.9 | <b>0.022</b> |
| B130017P16Rik | RIKEN cDNA B130017P16 gene (B130017P16Rik), mRNA.                                   | scl35423.7.1_70-S     | 410  | 8.9 | <b>0.018</b> |
| Cadps         | Ca <sup>2+</sup> dependent activator protein for secretion (Cadps), mRNA.           | scl027062.1_219-S     | 339  | 8.9 | <b>0.013</b> |
| Astn1         | astrotactin 1 (Astn1), mRNA.                                                        | scl000795.1_2960-S    | 416  | 8.7 | <b>0.005</b> |
| C230081G24Rik |                                                                                     | rijC230081G24 PX00176 |      |     |              |
|               |                                                                                     | N17 AK048916 1990-S   | 219  | 8.6 | 0.082        |
| 1700086L19Rik | RIKEN cDNA 1700086L19 gene (1700086L19Rik), mRNA.                                   | scl43092.8.1_221-S    | 484  | 8.6 | <b>0.010</b> |
| Ttbk1         | tau tubulin kinase 1 (Ttbk1), mRNA                                                  | scl49868.1.1_330-S    | 335  | 8.5 | <b>0.006</b> |
| Egr4          | early growth response 4 (Egr4), mRNA.                                               | scl860.2.1_228-S      | 200  | 8.5 | <b>0.000</b> |
| Gprasp1       | G protein-coupled receptor associated sorting protein 1 (Gprasp1), mRNA             | scl54622.12_49-S      | 1815 | 8.4 | <b>0.031</b> |
| Dnajc6        | DnaJ (Hsp40) homolog, subfamily C, member 6 (Dnajc6), mRNA.                         | scl0072685.1_143-S    | 755  | 8.4 | <b>0.015</b> |
| Myt1l         | myelin transcription factor 1-like (Myt1l), mRNA                                    | scl3889.1.1_37-S      | 309  | 8.3 | <b>0.048</b> |
| Cdkn2a        | cyclin-dependent kinase inhibitor 2A (Cdkn2a), mRNA.                                | scl24121.4.1_71-S     | 338  | 8.2 | <b>0.010</b> |
| Kcncb2        | potassium voltage gated channel, Shab-related subfamily, member 2                   | GI_38049341-S         | 352  | 8.2 | <b>0.035</b> |
| Pcsk2         | proprotein convertase subtilisin/kexin type 2 (Pcsk2), mRNA.                        | scl0018549.1_176-S    | 664  | 8.2 | <b>0.011</b> |
| Arxes1        | adipocyte-related X-chromosome expressed sequence 1 (Arxes1), mRNA                  | scl54618.1.2_1-S      | 878  | 8.2 | <b>0.003</b> |
| Rtn1          | reticulum 1 (Rtn1), mRNA.                                                           | scl42354.13_11-S      | 420  | 8.1 | <b>0.043</b> |
| Hdc           | histidine decarboxylase (Hdc), mRNA.                                                | scl18719.12.1_11-S    | 673  | 8.1 | <b>0.012</b> |
| Gja9          | gap junction membrane channel protein alpha 9 (Gja9), mRNA.                         | scl0014617.1_130-S    | 177  | 8.1 | <b>0.024</b> |
| Diras1        | DIRAS family, GTP-binding RAS-like 1 (Diras1), mRNA.                                | scl0208666.1_329-S    | 364  | 8.1 | <b>0.008</b> |
| Ddx26         | DEAD/H (Asp-Glu-Ala-Asp/His) box polypeptide 26                                     | rijD130058C17 PX00185 |      |     |              |
|               |                                                                                     | E04 AK051573 2962-S   | 1194 | 8.1 | <b>0.042</b> |
| Unc79         | unc-79 homolog (C. elegans)                                                         | scl42844.21.1_76-S    | 333  | 8.1 | <b>0.031</b> |
| Atp6v0e2      | ATPase, H <sup>+</sup> transporting, lysosomal V0 subunit E2 (VAtp6v0e2), mRNA      | scl30088.4_382-S      | 950  | 8.1 | <b>0.024</b> |
| Apof          | apolipoprotein F (Apof), mRNA.                                                      | scl38289.2_239-S      | 385  | 8.1 | 0.072        |
| Myt1          | myelin transcription factor 1 (Myt1), mRNA.                                         | GI_23346428-S         | 795  | 8.0 | <b>0.024</b> |
| Cidea         | cell death-inducing DNA fragmentation factor, alpha subunit-like effector A (Cidea) | scl51827.6.1_1-S      | 515  | 8.0 | <b>0.036</b> |
| A230058F20Rik | RIKEN cDNA A230058F20 gene                                                          | scl54973.1.1243_164-S | 376  | 8.0 | 0.129        |
| 1190002F15Rik | RIKEN cDNA 1190002F15 gene                                                          | scl0381822.1_19-S     | 375  | 8.0 | 0.063        |
| B230216G23Rik | RIKEN cDNA B230216G23 gene                                                          | scl29383.4.1_215-S    | 302  | 8.0 | <b>0.009</b> |
| Gad1          | glutamic acid decarboxylase 1 (Gad1), mRNA.                                         | scl0003045.1_120-S    | 199  | 8.0 | <b>0.040</b> |
| 1700023F06Rik | RIKEN cDNA 1700023F06 gene (1700023F06Rik), mRNA.                                   | scl39486.4.1_56-S     | 380  | 8.0 | <b>0.016</b> |
| Col9a2        | procollagen, type IX, alpha 2 (Col9a2), mRNA.                                       | scl012840.32_211-S    | 245  | 7.9 | <b>0.010</b> |
| N4bp2l1       | NEDD4 binding protein 2-like 1 (N4bp2l1), mRNA                                      | scl070229.1_18-S      | 296  | 7.9 | 0.113        |
| Lrg1          | leucine-rich alpha-2-glycoprotein 1 (Lrg1), mRNA.                                   | scl49773.2_28-S       | 1716 | 7.8 | <b>0.025</b> |
| <b>Syt7</b>   | synaptotagmin VII                                                                   | scl6307.1.1_179-S     | 342  | 7.8 | <b>0.048</b> |
| Emb           | embigin (Emb), mRNA.                                                                | scl013723.9_229-S     | 1091 | 7.8 | <b>0.015</b> |

|                |                                                                                                                    |                                                         |      |     |              |
|----------------|--------------------------------------------------------------------------------------------------------------------|---------------------------------------------------------|------|-----|--------------|
| Nrxn2          | neurexin II (Nrxn2), mRNA                                                                                          | scl52878.1.594_203-S                                    | 335  | 7.8 | <b>0.032</b> |
| B3galt3        | UDP-Gal:betaGlcNAc beta 1,3-galactosyltransferase, polypeptide 3 (B3galt3), mRNA.                                  | scl22075.4_6-S                                          | 570  | 7.7 | <b>0.031</b> |
| D3Bwg0562e     | DNA segment, Chr 3, Brigham & Womens Genetics 0562 expressed (D3Bwg0562e), mRNA.                                   | scl21599.7_90-S                                         | 216  | 7.7 | <b>0.002</b> |
| Svop           | SV2 related protein (Svop), mRNA                                                                                   | scl26188.18_422-S                                       | 384  | 7.7 | <b>0.029</b> |
| Mmp24          | matrix metalloproteinase 24 (Mmp24), mRNA.                                                                         | scl20046.9_689-S                                        | 341  | 7.6 | <b>0.011</b> |
| <b>Gria3</b>   | glutamate receptor, ionotropic, AMPA3 (alpha 3) (Gria3), mRNA.                                                     | scl8260.1.1_298-S                                       | 489  | 7.6 | 0.115        |
| Ica1l          | islet cell autoantigen 1-like (Ica1l), mRNA                                                                        | scl16712.12_256-S                                       | 298  | 7.6 | <b>0.009</b> |
| <b>Neurod1</b> | neurogenic differentiation 1 (Neurod1), mRNA.                                                                      | scl19085.2_285-S                                        | 452  | 7.6 | <b>0.004</b> |
| Rasgrf1        | RAS protein-specific guanine nucleotide-releasing factor 1 (Rasgrf1), mRNA.                                        | scl36632.28.1_170-S                                     | 523  | 7.6 | 0.059        |
| Brsk2          | BR serine/threonine kinase 2 (Brsk2), mRNA                                                                         | scl075770.2_292-S                                       | 344  | 7.6 | <b>0.024</b> |
| C230072K23     |                                                                                                                    | scl0328429.2_283-S                                      | 143  | 7.6 | <b>0.046</b> |
| <b>Syt1</b>    | synaptotagmin 1 (Syt1), mRNA.                                                                                      | scl0020979.2_107-S                                      | 314  | 7.5 | <b>0.002</b> |
| Rfx4           | regulatory factor X, 4 (influences HLA class II expression) (Rfx4), mRNA.                                          | scl38612.22.1_93-S                                      | 211  | 7.5 | 0.059        |
| Cyfp2          | cytoplasmic FMR1 interacting protein 2 (Cyfp2), mRNA.                                                              | scl40305.32_46-S                                        | 698  | 7.5 | <b>0.025</b> |
| 5930404A08Rik  |                                                                                                                    | ri 5930404A08 PX00055G<br>02 AK031091 2291-S            | 288  | 7.5 | <b>0.041</b> |
| <b>Syn1</b>    | synapsin I (Syn1), mRNA.                                                                                           | scl54358.13_95-S                                        | 524  | 7.5 | <b>0.001</b> |
| Eif2s3y        | eukaryotic translation initiation factor 2, subunit 3, structural gene Y-linked (Eif2s3y), mRNA.                   | scl0026908.1_233-S                                      | 186  | 7.3 | 0.407        |
| Cpe            | carboxypeptidase E (Cpe), mRNA.                                                                                    | scl34760.11.1_14-S                                      | 8314 | 7.3 | <b>0.008</b> |
| <b>Syng3</b>   | synaptogyrin 3 (Syng3), mRNA.                                                                                      | scl50202.5_41-S                                         | 200  | 7.3 | <b>0.008</b> |
| Nkx6-1         | NK6 transcription factor related, locus 1 (Drosophila) (Nkx6-1), mRNA.                                             | scl26314.4.1_182-S                                      | 220  | 7.2 | <b>0.001</b> |
| Gm885          | predicted gene 885                                                                                                 | GI_38091893-S                                           | 254  | 7.2 | <b>0.008</b> |
| Ap3b2          | adaptor-related protein complex 3, beta 2 subunit (Ap3b2), mRNA.                                                   | scl31109.12.1_24-S                                      | 206  | 7.2 | <b>0.010</b> |
| Smarca1        | SWI/SNF related, matrix associated, actin dependent regulator of chromatin, subfamily a, member 1 (Smarca1), mRNA. | scl54295.26.1_21-S                                      | 680  | 7.2 | 0.051        |
| LOC333501      | similar to immunoglobulin kappa light chain variable region precursor (LOC333501), mRNA.                           | IGKV10-<br>95_AF029261_Ig_kappa_<br>variable_10-95_20-S | 419  | 7.0 | 0.209        |
| Olfm1          | olfactomedin 1 (Olfm1), mRNA.                                                                                      | scl0003387.1_1121-S                                     | 554  | 7.0 | <b>0.010</b> |
| Gpr158         | G protein-coupled receptor 158 (Gpr158), mRNA                                                                      | scl21222.12_521-S                                       | 200  | 7.0 | 0.050        |
| Plcx3          | phosphatidylinositol-specific phospholipase C, X domain containing 3                                               | scl48135.4.1_204-S                                      | 175  | 7.0 | 0.064        |
| Rims3          | regulating synaptic membrane exocytosis 3 (Rims3), mRNA.                                                           | scl25010.7_694-S                                        | 229  | 7.0 | 0.050        |
| Slp            | sex-limited protein (Slp), mRNA.                                                                                   | scl0020567.1_162-S                                      | 1136 | 7.0 | <b>0.005</b> |
| Igkv12-98      | immunoglobulin kappa variable 12-98                                                                                | IGKV12-<br>98_AJ235949_Ig_kappa_<br>variable_12-98_12-S | 182  | 7.0 | 0.309        |
| Lin7a          | lin 7 homolog a (C. elegans) (Lin7a), mRNA.                                                                        | scl00103301.1_320-S                                     | 247  | 7.0 | <b>0.019</b> |
| Rab3a          | RAB3A, member RAS oncogene family (Rab3a), mRNA.                                                                   | scl019339.5_272-S                                       | 453  | 6.9 | <b>0.009</b> |

|               |                                                                                 |                                              |      |     |              |
|---------------|---------------------------------------------------------------------------------|----------------------------------------------|------|-----|--------------|
| Snap91        | synaptosomal-associated protein 91 (Snap91), mRNA.                              | scl020616.1_75-S                             | 149  | 6.8 | <b>0.005</b> |
| Gpr85         | G protein-coupled receptor 85 (Gpr85), mRNA.                                    | scl0064450.1_199-S                           | 614  | 6.8 | <b>0.007</b> |
| Ust           | uronyl-2-sulfotransferase (Ust), mRNA                                           | scl38227.11_29-S                             | 484  | 6.7 | 0.053        |
| N4bp2l1       | NEDD4 binding protein 2-like 1 ( N4bp2l1), mRNA.                                | scl0100637.1_115-S                           | 752  | 6.7 | 0.072        |
| Add2          | adducin 2 (beta) (Add2), mRNA                                                   | scl072970.1_11-S                             | 180  | 6.7 | <b>0.040</b> |
| St6gal1       | beta galactoside alpha 2,6 sialyltransferase 1 (St6gal1), mRNA.                 | scl49300.12_501-S                            | 2023 | 6.7 | <b>0.017</b> |
| Stc1          | stanniocalcin 1 (Stc1), mRNA.                                                   | scl46141.4_0-S                               | 390  | 6.7 | <b>0.031</b> |
| Unc80         | unc-80 homolog (C. elegans) (Unc80), mRNA                                       | scl14607.1.1_266-S                           | 188  | 6.7 | <b>0.046</b> |
| BC007180      |                                                                                 | scl22435.1.2_91-S                            | 262  | 6.6 | <b>0.037</b> |
| 5330439M10Rik | RIKEN cDNA 5330439M10 gene (5330439M10Rik), mRNA.                               | scl38395.1.7_56-S                            | 205  | 6.6 | 0.095        |
| Cntnap2       | contactin associated protein-like 2 (Cntnap2), mRNA.                            | scl066797.3_51-S                             | 219  | 6.6 | <b>0.013</b> |
| <b>Syt5</b>   | synaptotagmin 5 (Syt5), mRNA.                                                   | scl31809.10.1_30-S                           | 171  | 6.6 | <b>0.004</b> |
| Pnma2         | paraneoplastic antigen MA2 (Pnma2), mRNA.                                       | scl46152.5_553-S                             | 257  | 6.6 | <b>0.000</b> |
| Prrt2         | proline-rich transmembrane protein 2 (Prrt2), mRNA                              | scl069017.6_7-S                              | 220  | 6.6 | <b>0.041</b> |
| C030014C12Rik |                                                                                 | scl43324.1.1_319-S                           | 243  | 6.6 | 0.087        |
| Nrip3         | nuclear receptor interacting protein 3 (Nrip3), mRNA.                           | scl30829.8_606-S                             | 290  | 6.5 | <b>0.001</b> |
| C4            | complement component 4 (within H-2S) (C4), mRNA.                                | scl012268.2_49-S                             | 354  | 6.5 | <b>0.004</b> |
| Sept3         | septin 3 (Sept3), mRNA                                                          | scl078356.1_225-S                            | 262  | 6.5 | <b>0.008</b> |
| 2900011O08Rik | RIKEN cDNA 2900011O08 gene (2900011O08Rik), mRNA.                               | scl49400.6_138-S                             | 211  | 6.5 | <b>0.007</b> |
| Nol4          | nucleolar protein 4 (Nol4), mRNA.                                               | scl0319211.1_216-S                           | 288  | 6.5 | <b>0.021</b> |
| Car10         | carbonic anhydrase 10 (Car10), mRNA.                                            | scl41039.12.1_215-S                          | 168  | 6.5 | 0.068        |
| Col8a1        | procollagen, type VIII, alpha 1 (Col8a1), mRNA.                                 | scl490.1.1_278-S                             | 219  | 6.5 | 0.055        |
| Amph          | amphiphysin (Amph), mRNA.                                                       | scl45034.23_392-S                            | 406  | 6.5 | <b>0.032</b> |
| Gdap1         | ganglioside-induced differentiation-associated-protein 1 (Gdap1), mRNA.         | scl0014545.2_19-S                            | 236  | 6.5 | <b>0.019</b> |
| Gnao1         | guanine nucleotide binding protein, alpha O (Gnao1), mRNA                       | scl33497.11_25-S                             | 1148 | 6.5 | <b>0.049</b> |
| Ggtl3         | gamma-glutamyltransferase-like 3 (Ggtl3), mRNA.                                 | scl18460.16.1_0-S                            | 227  | 6.5 | <b>0.013</b> |
| Kcnc1         | potassium voltage gated channel, Shaw-related subfamily, member 1 (Kcnc1), mRNA | scl0320399.1_192-S                           | 162  | 6.5 | <b>0.024</b> |
| Pkib          | protein kinase inhibitor beta, cAMP dependent, testis specific                  | ri 1500017O11 ZX00057K<br>11 AK005281 1288-S | 294  | 6.4 | <b>0.035</b> |
| Pap           | pancreatitis-associated protein (Pap), mRNA.                                    | scl29870.6.1_39-S                            | 296  | 6.4 | 0.187        |
| Cxcl2         | chemokine (C-X-C motif) ligand 2 (Cxcl2), mRNA.                                 | scl020310.4_115-S                            | 170  | 6.4 | 0.134        |
| Tmem22        | transmembrane protein 22                                                        | GI_38090024-S                                | 882  | 6.4 | <b>0.011</b> |
| 2700031B12Rik |                                                                                 | ri 2700031B12 ZX00063G<br>16 AK012306 1196-S | 254  | 6.4 | 0.081        |
| lapp          | islet amyloid polypeptide (lapp), mRNA.                                         | scl29386.3.1_1-S                             | 351  | 6.4 | 0.174        |
| Zcchc12       | zinc finger, CCHC domain containing 12 (Zcchc12), mRNA                          | scl54999.4_50-S                              | 482  | 6.4 | <b>0.004</b> |
| Fam171b       | family with sequence similarity 171, member B                                   | scl00241520.2_184-S                          | 344  | 6.4 | <b>0.010</b> |
| Cdh22         | cadherin 22 (Cdh22), mRNA.                                                      | scl18336.12.1_69-S                           | 119  | 6.3 | <b>0.025</b> |
| Fam131a       | family with sequence similarity 131, member A (Fam131a), mRNA                   | scl078408.1_245-S                            | 429  | 6.3 | <b>0.024</b> |
| Mamdc1        | MAM domain containing 1 (Mamdc1), mRNA.                                         | scl00320772.1_270-S                          | 233  | 6.2 | <b>0.039</b> |

|               |                                                                                      |                                                       |      |     |              |
|---------------|--------------------------------------------------------------------------------------|-------------------------------------------------------|------|-----|--------------|
| Cntnap2       | contactin associated protein-like 2 (Cntnap2), mRNA.                                 | scl0066797.1_308-S                                    | 281  | 6.2 | 0.064        |
| Gtl2          | GTL2, imprinted maternally expressed untranslated mRNA (Gtl2), mRNA.                 | scl42789.1.791_155-S                                  | 223  | 6.2 | 0.058        |
| Dos           | downstream of Stk11 (Dos), mRNA.                                                     | scl0216164.1_206-S                                    | 801  | 6.2 | <b>0.036</b> |
| Gng4          | guanine nucleotide binding protein (G protein), gamma 4 subunit (Gng4), mRNA.        | scl45060.6_526-S                                      | 509  | 6.2 | <b>0.000</b> |
| Fev           | FEV (ETS oncogene family) (Fev), mRNA.                                               | scl00260298.2_181-S                                   | 182  | 6.2 | <b>0.001</b> |
| <b>Ddc</b>    | dopa decarboxylase                                                                   | rij2610109O21 ZX000611<br>24 AK011834 1441-S          | 256  | 6.1 | <b>0.021</b> |
| Mmp13         | matrix metalloproteinase 13 (Mmp13), mRNA.                                           | scl37309.10_320-S                                     | 486  | 6.0 | <b>0.024</b> |
| Tuba1         | tubulin, alpha 1 (Tuba1), mRNA.                                                      | scl022142.1_236-S                                     | 668  | 6.0 | <b>0.012</b> |
| Rtn1          | reticulon 1 (Rtn1), mRNA.                                                            | scl00104001.2_121-S                                   | 360  | 6.0 | <b>0.011</b> |
| Serp2         | stress-associated endoplasmic reticulum protein family member 2 (Serp2), mRNA        | scl45288.5.3_74-S                                     | 238  | 6.0 | <b>0.018</b> |
| 2610042L04Rik | RIKEN cDNA 2610042L04 gene (2610042L04Rik), mRNA.                                    | scl0067055.1_222-S                                    | 96   | 5.9 | <b>0.039</b> |
| Nap115        | nucleosome assembly protein 1-like 5 (Nap115), mRNA.                                 | scl28956.1_12-S                                       | 250  | 5.9 | <b>0.021</b> |
| Abcb4         | ATP-binding cassette, sub-family B (MDR/TAP), member 4 (Abcb4), mRNA.                | scl26912.28.1_161-S                                   | 122  | 5.9 | <b>0.003</b> |
| Dnajc12       | DnaJ (Hsp40) homolog, subfamily C, member 12 (Dnajc12), mRNA.                        | scl38846.4.1_6-S                                      | 773  | 5.9 | <b>0.024</b> |
| 6430537F04    |                                                                                      | scl24334.3_574-S                                      | 213  | 5.9 | <b>0.033</b> |
| Gsdma         | gasdermin A (Gadma), mRNA                                                            | scl057911.12_253-S                                    | 337  | 5.9 | <b>0.035</b> |
| Mtap1b        | microtubule-associated protein 1 B (Mtap1b), mRNA.                                   | scl017755.1_80-S                                      | 330  | 5.8 | <b>0.015</b> |
| Isp1          | implantation serine protease 1 (Isp1), mRNA.                                         | scl50985.6.1_72-S                                     | 184  | 5.8 | 0.260        |
| Aatk          | apoptosis-associated tyrosine kinase (Aatk), mRNA.                                   | scl39250.15_28-S                                      | 1113 | 5.8 | <b>0.014</b> |
| Rmst          | rhabdomyosarcoma 2 associated transcript (non-coding RNA)                            | scl0320034.2_90-S                                     | 252  | 5.8 | 0.072        |
| Bhlhb9        | basic helix-loop-helix domain containing, class B9 (Bhlhb9), mRNA                    | scl54620.5_512-S                                      | 897  | 5.8 | <b>0.007</b> |
| Gm1631        | gene model 1631, (NCBI) (Gm1631), mRNA.                                              | scl0381371.3_13-S                                     | 178  | 5.7 | <b>0.048</b> |
| Mt3           | metallothionein 3 (Mt3), mRNA.                                                       | scl017751.1_8-S                                       | 228  | 5.7 | <b>0.001</b> |
| 5330431K02Rik | RIKEN cDNA 5330431K02 gene (5330431K02Rik), mRNA.                                    | scl43611.1.1_320-S                                    | 493  | 5.7 | <b>0.032</b> |
| Tubg2         | tubulin, gamma 2 (Tubg2), mRNA.                                                      | scl40892.11.1_309-S                                   | 248  | 5.7 | <b>0.028</b> |
| Gsbs          | G substrate (Gsbs), mRNA.                                                            | scl30000.5_56-S                                       | 169  | 5.7 | 0.119        |
| Lcn2          | lipocalin 2 (Lcn2), mRNA.                                                            | scl19446.4_4-S                                        | 248  | 5.7 | <b>0.001</b> |
| Igkv4-77      | immunoglobulin kappa variable 4-77                                                   | IGKV4-<br>77_AJ235940_Ig_kappa_<br>variable_4-77_18-S | 205  | 5.6 | 0.244        |
| Gm1673        | predicted gene 1673                                                                  | GI_38079650-S                                         | 432  | 5.6 | <b>0.047</b> |
| Mmp10         | matrix metalloproteinase 10 (Mmp10), mRNA.                                           | scl37305.10.1_6-S                                     | 731  | 5.5 | <b>0.038</b> |
| Syt11         | synaptotagmin 11 (Syt11), mRNA.                                                      | scl21963.5_3-S                                        | 1710 | 5.5 | <b>0.010</b> |
| Serping1      | serine (or cysteine) proteinase inhibitor, clade G, member 1 (Serping1), mRNA.       | scl19066.9.1_77-S                                     | 3904 | 5.5 | <b>0.013</b> |
| Spnb1         | spectrin beta 1 (Spnb1), mRNA                                                        | scl0020741.1_267-S                                    | 239  | 5.5 | <b>0.003</b> |
| Riid1         | regulatory subunit of type II PKA R-subunit (RIIa) domain containing 1 (Riid1), mRNA | scl21867.7.1_21-S                                     | 391  | 5.5 | <b>0.007</b> |
| Fez1          | fasciculation and elongation protein zeta 1 (zygin I) (Fez1), mRNA.                  | scl37121.13.1_3-S                                     | 383  | 5.5 | <b>0.018</b> |
| Sox2          | SRY-box containing gene 2 (Sox2), mRNA.                                              | scl020674.7_60-S                                      | 193  | 5.5 | <b>0.000</b> |



|               |                                                                                         |                                                 |      |     |              |
|---------------|-----------------------------------------------------------------------------------------|-------------------------------------------------|------|-----|--------------|
| Pgbd5         | piggyBac transposable element derived 5 (Pgbd5), mRNA                                   | scl067257.1_121-S                               | 316  | 5.5 | <b>0.028</b> |
| Pcdhb4        | protocadherin beta 4 (Pcdhb4), mRNA.                                                    | scl52071.1.29_20-S                              | 148  | 5.5 | <b>0.032</b> |
| Cacna2d1      | calcium channel, voltage-dependent, alpha2/delta subunit 1                              | ri D830029A14 PX00199P04 AK052898 1271-S        | 358  | 5.5 | <b>0.041</b> |
| Camk2n1       | calcium/calmodulin-dependent protein kinase II inhibitor 1                              | scl066259.1_113-S                               | 1694 | 5.5 | <b>0.009</b> |
| Mmp3          | matrix metalloproteinase 3 (Mmp3), mRNA.                                                | scl37307.8.1_29-S                               | 256  | 5.5 | 0.060        |
| Slp           | sex-limited protein (Slp), mRNA.                                                        | scl020567.3_14-S                                | 1015 | 5.4 | <b>0.021</b> |
| Cacng2        | calcium channel, voltage-dependent, gamma subunit 2 (Cacng2), mRNA.                     | scl46997.4_329-S                                | 156  | 5.4 | <b>0.016</b> |
| Ina           | internexin neuronal intermediate filament protein, alpha (Ina), mRNA.                   | GI_34328367-S                                   | 130  | 5.4 | <b>0.013</b> |
| 2700050C19Rik | RIKEN cDNA 1500009L16 gene                                                              | scl070232.4_204-S                               | 234  | 5.4 | <b>0.012</b> |
| D130083G05Rik |                                                                                         | ri D130083G05 PX00186P02 AK084071 1297-S        | 524  | 5.4 | 0.067        |
| Ppp2r2c       | protein phosphatase 2 (formerly 2A), regulatory subunit B (PR 52), gamma isoform        | scl27887.10_414-S                               | 210  | 5.4 | <b>0.000</b> |
| Il1b          | interleukin 1 beta (Il1b), mRNA.                                                        | scl18674.7.1_35-S                               | 316  | 5.4 | 0.230        |
| Cdh13         | cadherin 13 (Cdh13), mRNA.                                                              | scl0012554.2_76-S                               | 602  | 5.3 | <b>0.015</b> |
| Tecta         | tectorin alpha (Tecta), mRNA.                                                           | scl35982.24.1_47-S                              | 187  | 5.3 | <b>0.033</b> |
| Ppp1r3f       | protein phosphatase 1, regulatory (inhibitor) subunit 3F (Ppp1r3f), mRNA.               | scl54449.5_574-S                                | 268  | 5.3 | <b>0.023</b> |
| Stmn1         | stathmin 1 (Stmn1), mRNA.                                                               | scl016765.5_129-S                               | 720  | 5.3 | 0.058        |
| Smyd4         | SET and MYND domain containing 4 (Smyd4), mRNA.                                         | scl41266.11.1_55-S                              | 273  | 5.3 | <b>0.018</b> |
| Tceal5        | Tceal5, transcription elongation factor A (SII)-like 5 (Tceal5), mRNA                   | scl53816.4_374-S                                | 511  | 5.3 | <b>0.010</b> |
| IgI-V1        | immunoglobulin lambda variable 1                                                        | scl016142.1_30-S                                | 464  | 5.3 | 0.225        |
| <b>Sv2b</b>   | synaptic vesicle glycoprotein 2 b (Sv2b), mRNA.                                         | scl31171.16_606-S                               | 333  | 5.3 | <b>0.039</b> |
| Clgn          | calmegin (Clgn), mRNA.                                                                  | scl33608.15_606-S                               | 240  | 5.3 | 0.051        |
| Cckbr         | cholecystokinin B receptor (Cckbr), mRNA.                                               | scl012426.5_191-S                               | 617  | 5.3 | <b>0.006</b> |
| LOC328644     | hypothetical gene supported by AK045595 (LOC328644), mRNA.                              | scl0328644.3_317-S                              | 218  | 5.2 | 0.060        |
| Slc35f3       | solute carrier family 35, member F3 (Slc35f3), mRNA.                                    | scl33165.11.1_4-S                               | 183  | 5.2 | <b>0.011</b> |
| Prkcb         | protein kinase C, beta (Prkcb), mRNA                                                    | scl018751.17_49-S                               | 622  | 5.2 | <b>0.011</b> |
| D630047N04Rik | neurotransmitter transporter (fragment) homolog [Mus musculus]                          | ri D630047N04 PX00198K07 AK085620 3080-S        | 122  | 5.2 | 0.054        |
| Nsg1          | neuron specific gene family member 1 (Nsg1), mRNA.                                      | scl26668.5_235-S                                | 210  | 5.2 | <b>0.001</b> |
| Diras2        | DIRAS family, GTP-binding RAS-like 2 (Diras2), mRNA                                     | scl43971.2.2_53-S                               | 1126 | 5.2 | <b>0.024</b> |
| Fez1          | fasciculation and elongation protein zeta 1 (zygin I) (Fez1), mRNA.                     | scl0003544.1_55-S                               | 419  | 5.2 | <b>0.008</b> |
| LOC385615     | similar to hypothetical protein FLJ10201 (LOC385615), mRNA.                             | GI_38080559-S                                   | 131  | 5.1 | 0.052        |
| Myo5a         | myosin VA                                                                               | scl36699.4_279-S                                | 274  | 5.1 | <b>0.012</b> |
| Fbxl16        | F-box and leucine-rich repeat protein 16                                                | scl0214931.6_73-S                               | 157  | 5.1 | <b>0.000</b> |
| NCAM-140      | Mouse mRNA fragment for neural cell adhesion molecule (NCAM-140).                       | scl0003519.1_175-S                              | 749  | 5.1 | 0.057        |
| LOC243430     | similar to Ig kappa light chain precursor (LOC243430), mRNA.                            | IGKV9-124_AF003294_Ig_kappa_variable_9-124_18-S | 347  | 5.1 | 0.129        |
| Fscn1         | fascin homolog 1, actin bundling protein (Strongylocentrotus purpuratus) (Fscn1), mRNA. | scl27024.7_349-S                                | 328  | 5.1 | <b>0.004</b> |

|               |                                                                                                 |                                               |      |     |              |
|---------------|-------------------------------------------------------------------------------------------------|-----------------------------------------------|------|-----|--------------|
| Tm4sf4        | transmembrane 4 superfamily member 4 (Tm4sf4), mRNA.                                            | scl23175.3_26-S                               | 1245 | 5.0 | <b>0.012</b> |
| 6330509M05Rik | RIKEN cDNA 6330509M05 gene                                                                      | scl7210.1.1_253-S                             | 451  | 5.0 | <b>0.024</b> |
| Igkv4-73      | immunoglobulin kappa variable 4-73                                                              | IGKV4-73_AJ231216_Ig_kappa_variable_4-73_18-S | 407  | 5.0 | 0.210        |
| Eef1a2        | eukaryotic translation elongation factor 1 alpha 2 (Eef1a2), mRNA.                              | scl18213.3.5_8-S                              | 101  | 5.0 | <b>0.003</b> |
| Ndn           | necdin (Ndn), mRNA.                                                                             | scl32592.2.658_11-S                           | 2985 | 5.0 | <b>0.007</b> |
| Opcml         | opioid binding protein/cell adhesion molecule-like (Opcml), mRNA                                | scl37169.1_27-S                               | 199  | 5.0 | <b>0.038</b> |
| Rundc3b,      | RUN domain containing 3B                                                                        | scl0242819.10_30-S                            | 205  | 5.0 | <b>0.012</b> |
| Mllt11        | myeloid/lymphoid or mixed-lineage leukemia (trithorax homolog, Drosophila); translocated to, 11 | scl056772.1_0-S                               | 896  | 5.0 | <b>0.000</b> |
| Fam163a       | family with sequence similarity 163, member A                                                   | scl16107.5.1_203-S                            | 122  | 5.0 | <b>0.000</b> |
| <b>Ncam1</b>  | neural cell adhesion molecule 1 (Ncam1), mRNA.                                                  | scl35883.23_148-S                             | 466  | 5.0 | <b>0.018</b> |
| Zfp365        | zinc finger protein 365 (Zfp365), mRNA.                                                         | scl37856.7_341-S                              | 226  | 5.0 | <b>0.019</b> |

<sup>1</sup> genes encoding known neuroendocrine proteins or transcription factors involved the development of the neuroendocrine lineage are shown in bold; <sup>2</sup> p values < 0.05 are shown in bold
