# Supplementary material for: Expression of a Neuroendocrine Gene Signature in Gastric Tumor Cells from CEA 424-SV40 Large T Antigen-Transgenic Mice Depends on SV40 Large T Antigen
Source: PubMed Central journal article supplement (PMC3258231; doi:10.1371/journal.pone.0029846), 2012-01-13
Supplement: pone.0029846.s003.pdf [file pone.0029846.s003.pdf]

**Table S2: Fraction of neuroendocrine (NE) genes/probe sets up- or down-regulated in tumors of CEA424-SV40 TAg mice:** A gene was classified as “neuroendocrine gene” when  $\geq 10$  publications were identified with the search terms “<long form of gene name>” and “neuroendocrine” in PubMed (October 2011).

| <b>Age of tumor-bearing mouse</b> | <b>Fold overexpression in tumor-bearing vs normal antrum (upregulated in tumor)</b>   | <b>Fraction of NE genes (overexpressed NE / total overexpressed genes)</b> |
|-----------------------------------|---------------------------------------------------------------------------------------|----------------------------------------------------------------------------|
| 30 d                              | $\geq 20$                                                                             | - % (0/0)                                                                  |
| 30 d                              | $\geq 10$                                                                             | 50 % (1/2)                                                                 |
| 30 d                              | $\geq 5$                                                                              | 75 % (3/4)                                                                 |
|                                   |                                                                                       |                                                                            |
| 60 d                              | $\geq 20$                                                                             | 100 % (2/2)                                                                |
| 60 d                              | $\geq 10$                                                                             | 86 % (6/7)                                                                 |
| 60 d                              | $\geq 5$                                                                              | 30 % (8/27)                                                                |
|                                   |                                                                                       |                                                                            |
| 90 d                              | $\geq 20$                                                                             | 38 % (16/42)                                                               |
| 90 d                              | $\geq 10$                                                                             | 20 % (26/128)                                                              |
| 90 d                              | $\geq 5$                                                                              | 11 % (38/338)                                                              |
|                                   |                                                                                       |                                                                            |
| <b>Age of tumor-bearing mouse</b> | <b>Fold overexpression in normal vs tumor-bearing antrum (downregulated in tumor)</b> | <b>Fraction of NE genes (downregulated NE / total downregulated genes)</b> |
| 90 d                              | $\geq 5$                                                                              | 1.6 % (2*/129)                                                             |

\*secretin, gastrin
