# Supplementary material for: Expression of a Neuroendocrine Gene Signature in Gastric Tumor Cells from CEA 424-SV40 Large T Antigen-Transgenic Mice Depends on SV40 Large T Antigen
Source: PubMed Central journal article supplement (PMC3258231; doi:10.1371/journal.pone.0029846), 2012-01-13
Supplement: pone.0029846.s004.pdf [file pone.0029846.s004.pdf]

**Table S3: Expression of transcription factor and DNA-binding protein genes from the Syder signature in d90 CEA424-SV40 TAg tumors**

| Gene        | Description                                                                        | Accession   | Probe set <sup>1</sup> | fluorescence<br>d90 tumor | fold change | P value <sup>2</sup> |
|-------------|------------------------------------------------------------------------------------|-------------|------------------------|---------------------------|-------------|----------------------|
| Nkx2-2      | NK2 transcription factor related, locus 2 (Drosophila) (Nkx2-2)                    | NM_010919.1 | scl0018088.2_84-S      | 490                       | 21.1        | <b>0.010</b>         |
| Etv1        | ets variant gene 1 (Etv1)                                                          | NM_007960.1 | scl014009.13_0-S       | 2437                      | 17.3        | <b>0.014</b>         |
| Peg3        | paternally expressed 3 (Peg3)                                                      | NM_008817   | scl018616.1_273-S      | 851                       | 11.9        | 0.077                |
| Neurod1     | neurogenic differentiation 1 (Neurod1)                                             | NM_010894.1 | scl19085.2_285-S       | 452                       | 7.6         | <b>0.004</b>         |
| Sox2        | SRY-box containing gene 2 (Sox2)                                                   | NM_011443.2 | scl020674.7_60-S       | 193                       | 5.5         | <b>0.000</b>         |
| Ndn         | necdin (Ndn)                                                                       | NM_010882.2 | scl32592.2.658_11-S    | 2985                      | 5.0         | <b>0.007</b>         |
| Cntn1       | contactin 1 (Cntn1)                                                                | NM_007727   | scl47598.31_288-S      | 193                       | 4.9         | <b>0.029</b>         |
| Peg3        | paternally expressed 3 (Peg3)                                                      | NM_008817.1 | scl0018616.2_167-S     | 134                       | 4.8         | <b>0.040</b>         |
| Hey1        | hairly/enhancer-of-split related with YRPW motif 1 (Hey1)                          | NM_010423.1 | scl22405.4_235-S       | 241                       | 3.3         | <b>0.003</b>         |
| Myef2       | myelin basic protein expression factor 2, repressor (Myef2)                        | NM_010852.1 | scl0017876.1_262-S     | 225                       | 3.0         | <b>0.020</b>         |
| Crem        | cAMP responsive element modulator (Crem)                                           | NM_013498.1 | scl51699.17_197-S      | 135                       | 2.9         | <b>0.010</b>         |
| Ddef1       | development and differentiation enhancing (Ddef1)                                  | NM_010026.1 | scl47133.29_179-S      | 267                       | 2.4         | <b>0.001</b>         |
| Zfp612      | zinc finger protein 612 (Zfp612), mRNA.                                            | NM_175480.3 | scl00234725.2_22-S     | 193                       | 2.4         | <b>0.009</b>         |
| Sox2        | SRY-box containing gene 2 (Sox2)                                                   | NM_011443.2 | scl23279.1.1_50-S      | 136                       | 2.4         | <b>0.000</b>         |
| Nap111      | nucleosome assembly protein 1-like 1 (Nap111)                                      | NM_015781.2 | scl38446.16_40-S       | 352                       | 2.4         | <b>0.001</b>         |
| Atf5        | activating transcription factor 5 (Atf5)                                           | NM_030693.1 | scl31408.4_131-S       | 640                       | 2.2         | <b>0.022</b>         |
| Cugbp2      | CUG triplet repeat,RNA binding protein 2 (Cugbp2)                                  | NM_010160.1 | scl014007.1_13-S       | 269                       | 2.1         | <b>0.000</b>         |
| Ppargc1a    | peroxisome proliferative activated receptor, gamma, coactivator 1 alpha (Ppargc1a) | NM_008904.1 | scl26595.14.1_90-S     | 229                       | 1.7         | <b>0.036</b>         |
| Cugbp2      | CUG triplet repeat,RNA binding protein 2 (Cugbp2)                                  | NM_010160.1 | scl0014007.1_233-S     | 345                       | 1.5         | <b>0.008</b>         |
| Nap111      | nucleosome assembly protein 1-like 1 (Nap111)                                      | NM_015781.2 | scl0003917.1_104-S     | 569                       | 1.5         | <b>0.031</b>         |
| Ssbp2       | single-stranded DNA binding protein 2 (Ssbp2)                                      | NM_024186.1 | scl0066970.1_29-S      | 119                       | 1.5         | <b>0.031</b>         |
| Ssbp2       | single-stranded DNA binding protein 2 (Ssbp2)                                      | NM_024186.1 | scl0003713.1_190-S     | 242                       | 1.4         | <b>0.036</b>         |
| Rbm18       | RNA binding motif protein 18 (Rbm18), mRNA.                                        | NM_026434.2 | scl19388.5_90-S        | 410                       | 1.3         | 0.058                |
| Nr1d2       | nuclear receptor subfamily 1, group D, member 2 (Nr1d2)                            | NM_011584.2 | scl00353187.1_48-S     | 163                       | 1.2         | 0.174                |
| Zfhx1a/Zeb1 | zinc finger homeobox 1a (Zfhx1a)                                                   | NM_011546.1 | scl0021417.2_96-S      | 211                       | 1.1         | 0.421                |
| Nr2f1       | nuclear receptor subfamily 2, group F, member 1 (Nr2f1)                            | NM_010151.1 | scl43736.6_95-S        | 282                       | -1.2        | 0.391                |
| Irf1        | interferon regulatory factor 1 (Irf1)                                              | NM_008390.1 | scl0001336.1_35-S      | 187                       | -1.4        | 0.375                |
| Hopx        | homeobox only domain (Hod), mRNA.                                                  | AK003784    | rij1110018K11 R00001   | 359                       | -1.5        | 0.378                |

<sup>1</sup> only probe sets exhibiting a fluorescence of >100 (RFU) are shown; <sup>2</sup> p values < 0.05 are shown in bold
