# Supplementary material for: Expression of a Neuroendocrine Gene Signature in Gastric Tumor Cells from CEA 424-SV40 Large T Antigen-Transgenic Mice Depends on SV40 Large T Antigen
Source: PubMed Central journal article supplement (PMC3258231; doi:10.1371/journal.pone.0029846), 2012-01-13
Supplement: pone.0029846.s005.pdf [file pone.0029846.s005.pdf]

**Supplementary Table S4: Genes deregulated in 424GC cells by SV40 TAg-specific siRNA**

| <b>Gene<sup>1</sup></b> | <b>Description</b>                                                               | <b>Probe set</b>      | <b>Expression<br/>(mean) without<br/>TAg siRNA</b> | <b>Fold down-<br/>regulation<br/>+siRNA</b> | <b>P value<sup>2</sup></b> |
|-------------------------|----------------------------------------------------------------------------------|-----------------------|----------------------------------------------------|---------------------------------------------|----------------------------|
| Mela                    | melanoma antigen                                                                 | scl017276.1_218-S     | 1440                                               | 7.49                                        | <b>0.000</b>               |
| MSV                     | Murine sarcoma virus                                                             | 9626100_15-S          | 4360                                               | 5.27                                        | <b>0.000</b>               |
| mt-Nd4l                 | mt-Nd4l                                                                          | scl0017720.1_306-S    | 1365                                               | 4.86                                        | <b>0.000</b>               |
| Tmed2                   | transmembrane emp24 domain trafficking protein 2                                 | scl056334.4_3-S       | 2219                                               | 4.65                                        | <b>0.000</b>               |
| Hnrpa2b1                | heterogeneous nuclear ribonucleoprotein A2/B1                                    | scl0053379.2_22-S     | 1396                                               | 4.56                                        | <b>0.000</b>               |
| Abl-MuLV                | Abelson murine leukemia virus                                                    | 9626953_200-S         | 2238                                               | 4.10                                        | <b>0.000</b>               |
| Eif4g2                  | eukaryotic translation initiation factor 4, gamma 2                              | scl000210.1_44-S      | 562                                                | 4.09                                        | <b>0.000</b>               |
| Ldha                    | lactate dehydrogenase A                                                          | scl0001816.1_0-S      | 1179                                               | 3.90                                        | <b>0.000</b>               |
| Ldha                    | lactate dehydrogenase A                                                          | scl016828.6_330-S     | 2367                                               | 3.88                                        | <b>0.000</b>               |
| Snurf                   | SNRPN upstream reading frame                                                     | scl000252.1_5-S       | 1124                                               | 3.77                                        | <b>0.000</b>               |
| Rbbp7                   | retinoblastoma binding protein 7                                                 | scl0245688.1_74-S     | 682                                                | 3.54                                        | <b>0.000</b>               |
| Tubb5                   | tubulin, beta 5                                                                  | scl49975.4.297_19-S   | 856                                                | 3.54                                        | <b>0.000</b>               |
| <b>Gnas</b>             | GNAS (guanine nucleotide binding protein, alpha stimulating)<br>complex locus    | scl014683.1_3-S       | 1884                                               | 3.53                                        | <b>0.000</b>               |
| Ppp1cb                  | protein phosphatase 1, catalytic subunit, beta isoform                           | scl0004044.1_9-S      | 538                                                | 3.48                                        | <b>0.000</b>               |
| Tcp1                    | t-complex protein 1                                                              | scl0001621.1_13-S     | 602                                                | 3.48                                        | <b>0.000</b>               |
| NA                      | RIKEN cDNA 1810009A16 gene                                                       | scl0002667.1_44-S     | 396                                                | 3.42                                        | <b>0.000</b>               |
| Psmc13                  | proteasome (prosome, macropain) 26S subunit, non-ATPase, 13                      | scl00071.1_7-S        | 777                                                | 3.41                                        | <b>0.000</b>               |
| <b>Pdyn</b>             | prodynorphin                                                                     | scl18671.5_48-S       | 5796                                               | 3.34                                        | <b>0.000</b>               |
| Snrpn                   | small nuclear ribonucleoprotein N                                                | scl0020646.1_10-S     | 764                                                | 3.33                                        | <b>0.000</b>               |
| Ppp1ca                  | protein phosphatase 1, catalytic subunit, alpha isoform                          | scl000534.1_21-S      | 1644                                               | 3.30                                        | <b>0.000</b>               |
| Ccnb1                   | cyclin B1                                                                        | scl0268697.4_6-S      | 1814                                               | 3.29                                        | <b>0.000</b>               |
| NA                      | similar to G2/mitotic-specific cyclin B1 (LOC328752)                             | GI_38075552-S         | 435                                                | 3.17                                        | <b>0.000</b>               |
| Pgk1                    | phosphoglycerate kinase 1                                                        | scl018655.12_25-S     | 7134                                               | 3.16                                        | <b>0.000</b>               |
| NA                      | hypothetical protein LOC280487                                                   | GI_38081456-I         | 404                                                | 3.14                                        | <b>0.000</b>               |
| Tpx2                    | TPX2, microtubule-associated protein homolog (Xenopus laevis)                    | scl20105.20_178-S     | 1215                                               | 3.06                                        | <b>0.000</b>               |
| Emp1                    | epithelial membrane protein 1                                                    | scl29429.7_143-S      | 1718                                               | 3.04                                        | <b>0.000</b>               |
| Tpm3                    | tropomyosin 3, gamma                                                             | scl0001950.1_6-S      | 908                                                | 3.02                                        | <b>0.000</b>               |
| <b>Chga</b>             | chromogranin A                                                                   | scl0002400.1_38-S     | 6386                                               | 2.99                                        | <b>0.000</b>               |
| NA                      | expressed sequence AI505012                                                      | scl46834.6.2176_154-S | 654                                                | 2.99                                        | <b>0.000</b>               |
| Atp5k                   | ATP synthase, H <sup>+</sup> transporting, mitochondrial F1F0 complex, subunit e | scl011958.2_29-S      | 1378                                               | 2.98                                        | <b>0.000</b>               |
| 3110032G18Rik           | RIKEN cDNA 3110032G18 gene                                                       | scl27213.3_538-S      | 1351                                               | 2.97                                        | <b>0.000</b>               |

|               |                                                                                            |                    |       |      |              |
|---------------|--------------------------------------------------------------------------------------------|--------------------|-------|------|--------------|
| Tram1         | translocating chain-associating membrane protein 1                                         | scl16982.5.1_3-S   | 481   | 2.97 | <b>0.000</b> |
| Cdkn2c        | cyclin-dependent kinase inhibitor 2C (p18, inhibits CDK4)                                  | scl0002624.1_576-S | 725   | 2.95 | <b>0.000</b> |
| Mki67         | antigen identified by monoclonal antibody Ki 67                                            | scl0017345.1_1-S   | 1349  | 2.92 | <b>0.000</b> |
| Fkbp11        | FK506 binding protein 11                                                                   | scl46759.5.1_10-S  | 1425  | 2.91 | <b>0.000</b> |
| Kns2          | kinesin 2                                                                                  | scl0002405.1_260-S | 822   | 2.89 | <b>0.000</b> |
| Cltc          | clathrin, heavy polypeptide                                                                | scl0001345.1_85-S  | 649   | 2.89 | <b>0.000</b> |
| Rbbp7         | retinoblastoma binding protein 7                                                           | scl00245688.1_91-S | 631   | 2.89 | <b>0.000</b> |
| Pmp22         | peripheral myelin protein                                                                  | scl018858.5_31-S   | 717   | 2.88 | <b>0.000</b> |
| Ccnb1         | cyclin B1                                                                                  | scl43586.8_295-S   | 1264  | 2.87 | <b>0.000</b> |
| NA            | similar to RIKEN cDNA 2610524H06 gene                                                      | GI_38079875-S      | 556   | 2.86 | <b>0.000</b> |
| Pcna          | proliferating cell nuclear antigen                                                         | scl018538.1_192-S  | 1782  | 2.86 | <b>0.000</b> |
| Fin14         | fibroblast growth factor inducible 14                                                      | scl28579.2_420-S   | 1074  | 2.85 | <b>0.000</b> |
| Arl5a         | ADP-ribosylation factor-like 5A                                                            | scl0075423.2_59-S  | 354   | 2.83 | <b>0.000</b> |
| Atp5l         | similar to ATP synthase, H+ transporting, mitochondrial F0 complex,                        | GI_20888180-I      | 1946  | 2.83 | <b>0.000</b> |
| Ndufa5        | NADH dehydrogenase (ubiquinone) 1 alpha subcomplex, 5                                      | scl0001121.1_1-S   | 1511  | 2.82 | <b>0.000</b> |
| Hnrph1        | heterogeneous nuclear ribonucleoprotein H1                                                 | scl059013.8_10-S   | 1307  | 2.80 | <b>0.000</b> |
| Tmed2         | transmembrane emp24 domain trafficking protein 2                                           | scl0056334.1_201-S | 757   | 2.80 | <b>0.000</b> |
| Mcm5          | minichromosome maintenance deficient 5, cell division cycle 46<br>( <i>S. cerevisiae</i> ) | scl33659.17.1_21-S | 2655  | 2.77 | <b>0.000</b> |
| Mo-MSV        | Moloney murine sarcoma virus                                                               | 9626962_229-S      | 529   | 2.77 | <b>0.000</b> |
| Txndc14       | thioredoxin domain containing 14                                                           | scl0003075.1_15-S  | 380   | 2.76 | <b>0.000</b> |
| Dusp4         | dual specificity phosphatase 4                                                             | scl33912.4_501-S   | 559   | 2.74 | <b>0.000</b> |
| Kns2          | kinesin 2                                                                                  | scl0016593.2_91-S  | 832   | 2.74 | <b>0.000</b> |
| NA            | similar to envelope polyprotein                                                            | GI_38081137-S      | 494   | 2.74 | <b>0.000</b> |
| Stmn1         | stathmin 1                                                                                 | scl016765.5_129-S  | 1995  | 2.73 | <b>0.000</b> |
| Tnfrsf22      | tumor necrosis factor receptor superfamily, member 22                                      | scl0079202.2_327-S | 606   | 2.72 | <b>0.000</b> |
| Cdr2          | cerebellar degeneration-related 2                                                          | scl30730.6_511-S   | 741   | 2.70 | <b>0.000</b> |
| Tmem66        | transmembrane protein 66                                                                   | scl000679.1_109-S  | 655   | 2.70 | <b>0.000</b> |
| Myef2         | myelin basic protein expression factor 2, repressor                                        | scl0017876.1_262-S | 462   | 2.69 | <b>0.000</b> |
| mtDNA_ND2-S   | mtDNA_ND2-S                                                                                | mtDNA_ND2-S        | 13103 | 2.69 | <b>0.000</b> |
| Rauscher-MuLV | Rauscher murine leukemia virus                                                             | 9629514_325-S      | 405   | 2.65 | <b>0.000</b> |
| Cbx3          | chromobox homolog 3 ( <i>Drosophila</i> HP1 gamma)                                         | scl012417.4_32-S   | 990   | 2.63 | <b>0.000</b> |
| mtDNA_ND4L-S  | mtDNA_ND4L-S                                                                               | mtDNA_ND4L-S       | 5761  | 2.63 | <b>0.000</b> |
| Rhoa          | ras homolog gene family, member A                                                          | scl011848.5_0-S    | 1433  | 2.63 | <b>0.000</b> |
| Hnrph1        | heterogeneous nuclear ribonucleoprotein H1                                                 | scl0059013.2_121-S | 689   | 2.62 | <b>0.000</b> |
| Ucp2          | uncoupling protein 2 (mitochondrial, proton carrier)                                       | scl00035.1_45-S    | 2204  | 2.62 | <b>0.000</b> |
| Mela          | melanoma antigen                                                                           | scl0017276.1_44-S  | 692   | 2.61 | <b>0.000</b> |

|               |                                                                   |                                              |      |      |              |
|---------------|-------------------------------------------------------------------|----------------------------------------------|------|------|--------------|
| Cdc2a         | cell division cycle 2 homolog A (S. pombe)                        | scl0003783.1_100-S                           | 1156 | 2.60 | <b>0.000</b> |
| Tyms          | thymidylate synthase                                              | scl0004125.1_0-S                             | 823  | 2.60 | <b>0.000</b> |
| Gata2         | GATA binding protein 2                                            | scl29775.9_427-S                             | 895  | 2.59 | <b>0.000</b> |
| Friend-MuLV   | Friend murine leukemia virus                                      | 9626096_327-S                                | 353  | 2.59 | <b>0.000</b> |
| Cnot1         | CCR4-NOT transcription complex, subunit 1                         | scl00234594.1_78-S                           | 302  | 2.57 | <b>0.000</b> |
| Eif4g2        | eukaryotic translation initiation factor 4, gamma 2               | scl013690.1_50-S                             | 656  | 2.57 | <b>0.000</b> |
| Top2a         | topoisomerase (DNA) II alpha                                      | scl39614.33.3_6-S                            | 766  | 2.55 | <b>0.000</b> |
| Clspn         | claspin homolog (Xenopus laevis)                                  | scl00269582.1_78-S                           | 562  | 2.54 | <b>0.000</b> |
| Ddost         | dolichyl-di-phosphooligosaccharide-protein glycotransferase       | scl24791.10_1-S                              | 2372 | 2.54 | <b>0.000</b> |
| Gpsn2         | glycoprotein, synaptic 2                                          | scl000669.1_31-S                             | 2041 | 2.54 | <b>0.000</b> |
| Kctd12        | potassium channel tetramerisation domain containing 12            | scl00239217.2_149-S                          | 1084 | 2.53 | <b>0.000</b> |
| 3000004C01Rik | RIKEN cDNA 3000004C01 gene                                        | scl0070218.1_56-S                            | 526  | 2.49 | <b>0.000</b> |
| Rer1          | RER1 retention in endoplasmic reticulum 1 homolog (S. cerevisiae) | scl0002748.1_8-S                             | 1464 | 2.48 | <b>0.000</b> |
| NA            | similar to glyceraldehyde-3-phosphate dehydrogenase               | scl0277333.1_280-S                           | 824  | 2.47 | <b>0.000</b> |
| Dnajb11       | DnaJ (Hsp40) homolog, subfamily B, member 11                      | scl49316.10.1_12-S                           | 1829 | 2.47 | <b>0.000</b> |
| Rad51ap1      | RAD51 associated protein 1                                        | scl00112420.1_5-S                            | 382  | 2.47 | <b>0.000</b> |
| Anapc5        | anaphase-promoting complex subunit 5                              | scl0004124.1_11-S                            | 279  | 2.46 | <b>0.000</b> |
| 1810047C23Rik | RIKEN cDNA 1810047C23 gene                                        | scl000603.1_82-S                             | 824  | 2.45 | <b>0.000</b> |
| Ergic3        | ERGIC and golgi 3                                                 | scl20039.1_29-S                              | 473  | 2.45 | <b>0.000</b> |
| NA            | similar to RIKEN cDNA 2610524H06 gene                             | GI_38090371-S                                | 253  | 2.45 | <b>0.000</b> |
| S100a1        | S100 calcium binding protein A1                                   | scl21916.1_21-S                              | 970  | 2.45 | <b>0.000</b> |
| Ppapdc1       | phosphatidic acid phosphatase type 2 domain containing 1          | scl33962.6.1_87-S                            | 408  | 2.44 | <b>0.000</b> |
| NA            | similar to Ab2-450                                                | GI_38082567-S                                | 376  | 2.43 | <b>0.000</b> |
| NA            | similar to CG13990-PA                                             | GI_38095518-S                                | 233  | 2.42 | <b>0.000</b> |
| Papss2        | 3'-phosphoadenosine 5'-phosphosulfate synthase 2                  | scl0023972.1_63-S                            | 420  | 2.41 | <b>0.000</b> |
| Snrpa         | small nuclear ribonucleoprotein polypeptide A                     | scl053607.7_2-S                              | 261  | 2.41 | <b>0.000</b> |
| 2610036L11Rik | RIKEN cDNA 2610036L11 gene                                        | ri 1700015C21 ZX00037113 <br>AK005988 408-S  | 1334 | 2.40 | <b>0.000</b> |
| Nup85         | nucleoporin 85                                                    | ri 5730441M17 PX00003D10 <br>AK017632 2185-S | 1596 | 2.40 | <b>0.000</b> |
| NA            | similar to RIKEN cDNA 2610524H06 gene                             | GI_38079905-S                                | 411  | 2.39 | <b>0.000</b> |
| NA            | similar to CG32656-PA                                             | GI_38093896-S                                | 249  | 2.39 | <b>0.000</b> |
| Cdkn3         | cyclin-dependent kinase inhibitor 3                               | GI_38076060-S                                | 1398 | 2.38 | <b>0.000</b> |
| Fis1          | fission 1 (mitochondrial outer membrane) homolog (yeast)          | scl0004104.1_48-S                            | 726  | 2.37 | <b>0.000</b> |
| Kif23         | kinesin family member 23                                          | scl35732.23.1_51-S                           | 1699 | 2.37 | <b>0.000</b> |
| MSV           | Murine sarcoma virus                                              | 9626100_224-S                                | 8691 | 2.37 | <b>0.000</b> |

|             |                                                                    |                     |       |      |       |
|-------------|--------------------------------------------------------------------|---------------------|-------|------|-------|
| Sdf2l1      | stromal cell-derived factor 2-like 1                               | scl48713.2.9_29-S   | 434   | 2.37 | 0.000 |
| Tsc22d1     | TSC22 domain family, member 1                                      | scl000333.1_26-S    | 305   | 2.37 | 0.000 |
| Cdkn2d      | cyclin-dependent kinase inhibitor 2D (p19, inhibits CDK4)          | scl36146.3_205-S    | 752   | 2.36 | 0.000 |
| <b>Gcg</b>  | glucagon                                                           | scl19223.5.1_16-S   | 8010  | 2.36 | 0.000 |
| Lig1        | ligase I, DNA, ATP-dependent                                       | scl33069.30.1_21-S  | 913   | 2.36 | 0.000 |
| NA          | similar to RIKEN cDNA 2610524H06 gene                              | GI_38080728-S       | 255   | 2.36 | 0.000 |
| Eif5a       | eukaryotic translation initiation factor 5A                        | scl00276770.1_2-S   | 563   | 2.35 | 0.000 |
| Eno1        | enolase 1, alpha non-neuron                                        | scl013806.12_49-S   | 1216  | 2.35 | 0.000 |
| Fen1        | flap structure specific endonuclease 1                             | scl014156.1_86-S    | 999   | 2.35 | 0.000 |
| Spbc24      | spindle pole body component 24 homolog (S. cerevisiae)             | scl067629.2_23-S    | 802   | 2.35 | 0.000 |
| Ppa1        | pyrophosphatase (inorganic) 1                                      | scl38868.13.1_10-S  | 3144  | 2.34 | 0.000 |
| <b>Scg2</b> | secretogranin II                                                   | scl0020254.2_71-S   | 12526 | 2.34 | 0.000 |
| Smc2l1      | SMC2 structural maintenance of chromosomes 2-like 1 (yeast)        | scl25441.25_49-S    | 1100  | 2.34 | 0.000 |
| Gdi1        | guanosine diphosphate (GDP) dissociation inhibitor 1               | scl54834.6_26-S     | 270   | 2.33 | 0.000 |
| Gpi1        | glucose phosphate isomerase 1                                      | scl0014751.2_19-S   | 239   | 2.33 | 0.000 |
| Rpl22l1     | ribosomal protein L22 like 1                                       | scl068028.3_20-S    | 583   | 2.33 | 0.000 |
| Tgfb1       | transforming growth factor, beta 1                                 | scl32920.6.1_10-S   | 201   | 2.33 | 0.000 |
| Hist1h4f    | histone 1, H4f                                                     | scl00319157.1_0-S   | 424   | 2.32 | 0.000 |
| Atp6a1      | ATPase, H <sup>+</sup> transporting, lysosomal                     | GI_20892558-S       | 348   | 2.32 | 0.000 |
| NA          | C920004C08Rik                                                      | scl00319365.1_77-S  | 6147  | 2.31 | 0.000 |
| Psmb3       | proteasome (prosome, macropain) subunit, beta type 3               | GI_31981321-S       | 1245  | 2.31 | 0.000 |
| Hnrpa2b1    | heterogeneous nuclear ribonucleoprotein A2/B1                      | scl0001252.1_55-S   | 773   | 2.30 | 0.000 |
| Srm         | spermidine synthase                                                | scl0002839.1_0-S    | 362   | 2.30 | 0.000 |
| Tmpo        | thymopoietin                                                       | scl0003903.1_2-S    | 688   | 2.30 | 0.000 |
| Hsp90ab1    | heat shock protein 90kDa alpha (cytosolic), class B member 1       | scl0015516.2_144-S  | 1619  | 2.29 | 0.000 |
| Ndufs2      | NADH dehydrogenase (ubiquinone) Fe-S protein 2                     | scl000941.1_0-S     | 833   | 2.29 | 0.000 |
| Lgals3bp    | lectin, galactoside-binding, soluble, 3 binding protein            | scl39273.6_263-S    | 1357  | 2.28 | 0.000 |
| NA          | similar to Protein translation factor SU11 homolog                 | GI_38076453-S       | 797   | 2.28 | 0.000 |
| Rbmx        | RNA binding motif protein, X chromosome                            | scl0019655.2_139-S  | 428   | 2.28 | 0.000 |
| Tnfrsf22    | tumor necrosis factor receptor superfamily, member 22              | scl0319679.1_12-S   | 438   | 2.28 | 0.000 |
| E2f2        | E2F transcription factor 2                                         | scl00242705.1_180-S | 384   | 2.27 | 0.000 |
| Mki67       | antigen identified by monoclonal antibody Ki 67                    | scl30548.2_0-S      | 248   | 2.27 | 0.000 |
| <b>Sst</b>  | somatostatin                                                       | scl48628.2.9_30-S   | 1092  | 2.27 | 0.005 |
| Tpm3        | tropomyosin 3, gamma                                               | scl059069.6_0-S     | 286   | 2.27 | 0.000 |
| Zfp276      | zinc finger protein (C2H2 type) 276                                | scl15331.1.1_254-S  | 545   | 2.27 | 0.000 |
| Atp6ap2     | ATPase, H <sup>+</sup> transporting, lysosomal accessory protein 2 | scl0002902.1_39-S   | 769   | 2.26 | 0.000 |
| Ccna2       | cyclin A2                                                          | scl22236.8_4-S      | 295   | 2.26 | 0.000 |

|               |                                                                          |                                           |      |      |              |
|---------------|--------------------------------------------------------------------------|-------------------------------------------|------|------|--------------|
| NA            | similar to protein tyrosine phosphatase 4a1                              | GI_38085321-S                             | 460  | 2.26 | <b>0.000</b> |
| NA            | E130306D19Rik                                                            | scl24403.4_53-S                           | 341  | 2.26 | <b>0.000</b> |
| Acot7         | acyl-CoA thioesterase 7                                                  | scl24656.12.1_25-S                        | 1694 | 2.25 | <b>0.000</b> |
| Tfrc          | transferrin receptor                                                     | scl49235.18_0-S                           | 1040 | 2.25 | <b>0.000</b> |
| Hist1h3e      | histone 1, H3e                                                           | scl0319151.1_287-S                        | 312  | 2.24 | <b>0.000</b> |
| Pbk           | PDZ binding kinase                                                       | scl052033.7_30-S                          | 1163 | 2.24 | <b>0.000</b> |
| Sqle          | squalene epoxidase                                                       | scl0002494.1_23-S                         | 242  | 2.24 | <b>0.000</b> |
| Top2a         | topoisomerase (DNA) II alpha                                             | rij 2810021D13 ZX00034J13 AK028218 2851-S | 308  | 2.24 | <b>0.000</b> |
| Gdi1          | guanosine diphosphate (GDP) dissociation inhibitor 1                     | scl014567.8_50-S                          | 281  | 2.23 | <b>0.000</b> |
| Spbc25        | spindle pole body component 25 homolog (S. cerevisiae)                   | scl19174.6.1_6-S                          | 5254 | 2.23 | <b>0.000</b> |
| Clcn4-2       | chloride channel 4-2                                                     | scl012727.1_314-S                         | 336  | 2.22 | <b>0.000</b> |
| NA            | similar to protein 40kD (LOC380682)                                      | GI_38091007-S                             | 3444 | 2.22 | <b>0.000</b> |
| Spnb1         | spectrin beta 1                                                          | scl0020741.1_267-S                        | 389  | 2.22 | <b>0.000</b> |
| Cd24a         | CD24a antigen                                                            | scl012484.2_55-S                          | 687  | 2.21 | <b>0.000</b> |
| D17H6S56E-5   | DNA segment, Chr 17, human D6S56E 5                                      | scl50002.3_113-S                          | 830  | 2.21 | <b>0.000</b> |
| Kifc1         | kinesin family member C1                                                 | scl0094116.1_13-S                         | 590  | 2.21 | <b>0.000</b> |
| Metap2        | methionine aminopeptidase 2                                              | scl0056307.2_142-S                        | 458  | 2.21 | <b>0.000</b> |
| Mtch2         | mitochondrial carrier homolog 2 (C. elegans)                             | scl0056428.2_17-S                         | 598  | 2.21 | <b>0.000</b> |
| Tnfrsf11b     | tumor necrosis factor receptor superfamily, member 11b (osteoprotegerin) | scl47198.5_117-S                          | 1040 | 2.21 | <b>0.000</b> |
| Wdhd1         | WD repeat and HMG-box DNA binding protein 1                              | scl45649.23.1_18-S                        | 268  | 2.21 | <b>0.000</b> |
| Sep15         | selenoprotein                                                            | scl0002080.1_55-S                         | 1068 | 2.20 | <b>0.000</b> |
| 1110002E23Rik | RIKEN cDNA 1110002E23 gene                                               | rij 1110002E23 R000015G04 AK003291 514-S  | 1183 | 2.20 | <b>0.000</b> |
| Crip1         | cysteine-rich protein 1 (intestinal)                                     | scl012925.2_22-S                          | 609  | 2.20 | <b>0.000</b> |
| Fkbp2         | FK506 binding protein 2                                                  | scl014227.3_23-S                          | 4653 | 2.20 | <b>0.000</b> |
| Hist1h3d      | histone1, H3d                                                            | scl00319149.2_275-S                       | 318  | 2.20 | <b>0.000</b> |
| NA            | 5830431N17Rik                                                            | scl076036.1_45-S                          | 262  | 2.19 | <b>0.000</b> |
| SV40 TAg      | Large T specific_1733                                                    | SV40_large_T_Ag_specific-S                | 460  | 2.19 | <b>0.000</b> |
| Prc1          | protein regulator of cytokinesis 1                                       | scl32477.13_570-S                         | 3156 | 2.19 | <b>0.000</b> |
| Snrpa         | small nuclear ribonucleoprotein polypeptide A                            | scl0053607.2_0-S                          | 250  | 2.19 | <b>0.000</b> |
| Ube2c         | ubiquitin-conjugating enzyme E2C                                         | scl068612.6_90-S                          | 251  | 2.19 | <b>0.000</b> |
| Cox7a2        | cytochrome c oxidase, subunit VIIa 2                                     | scl35560.5_28-S                           | 1581 | 2.18 | <b>0.000</b> |
| NA            | similar to RIKEN cDNA 2610524H06 gene                                    | GI_38049380-S                             | 261  | 2.18 | <b>0.000</b> |
| NA            | 4632404B13Rik                                                            | rij 4632404B13 PX00012K06 AK028495 2689-S | 547  | 2.18 | <b>0.000</b> |

|           |                                                                                 |                              |      |      |       |
|-----------|---------------------------------------------------------------------------------|------------------------------|------|------|-------|
| Ndufa5    | NADH dehydrogenase (ubiquinone) 1 alpha subcomplex, 5                           | scl0068202.1_15-S            | 3590 | 2.18 | 0.000 |
| Ngfr      | nerve growth factor receptor (TNFR superfamily, member 16)                      | scl39687.7_423-S             | 628  | 2.18 | 0.000 |
| Rfc2      | replication factor C (activator 1) 2                                            | scl0004059.1_11-S            | 398  | 2.18 | 0.000 |
| Sep-15    | selenoprotein                                                                   | scl22501.2_29-S              | 684  | 2.17 | 0.000 |
| NA        | similar to Cytochrome c, somatic                                                | GI_38079525-S                | 6561 | 2.17 | 0.000 |
| NA        | NA                                                                              | scl000048.1_50<br>_REVCOMP-S | 946  | 2.17 | 0.000 |
| Eif5a     | NA                                                                              | scl40009.3.137_12-S          | 607  | 2.17 | 0.000 |
| Sfrs5     | splicing factor, arginine/serine-rich 5 (SRp40, HRS)                            | scl0002293.1_7-S             | 683  | 2.17 | 0.000 |
| Atp6ap2   | ATPase, H <sup>+</sup> transporting, lysosomal accessory protein 2              | scl0002891.1_24-S            | 996  | 2.16 | 0.000 |
| NA        | similar to Mitochondrial import inner membrane translocase subunit TIM23        | GI_38090481-S                | 773  | 2.16 | 0.000 |
| Srprb     | signal recognition particle receptor, B subunit                                 | scl020818.5_51-S             | 324  | 2.16 | 0.000 |
| Hist1h2bf | histone 1, H2bf                                                                 | scl0319180.1_4-S             | 641  | 2.15 | 0.000 |
| Hist1h4m  | histone 1, H4m                                                                  | GI_30089707-S                | 542  | 2.15 | 0.000 |
| Hmgn2     | high mobility group nucleosomal binding domain 2                                | scl015331.1_246-S            | 1084 | 2.15 | 0.000 |
| Nov       | nephroblastoma overexpressed gene                                               | scl47911.5_100-S             | 4338 | 2.15 | 0.000 |
| Nt5c3l    | 5'-nucleotidase, cytosolic III-like                                             | scl0001342.1_29-S            | 533  | 2.15 | 0.000 |
| Mt3       | metallothionein 3                                                               | scl017751.1_8-S              | 535  | 2.14 | 0.000 |
| Nt5c3l    | 5'-nucleotidase, cytosolic III-like                                             | scl0001518.1_3-S             | 198  | 2.14 | 0.000 |
| Pak3      | p21 (CDKN1A)-activated kinase 3                                                 | scl018481.14_0-S             | 1747 | 2.14 | 0.000 |
| Rab6      | RAB6, member RAS oncogene family                                                | scl00072.1_32-S              | 585  | 2.14 | 0.000 |
| Tmem49    | transmembrane protein 49                                                        | scl0001344.1_14-S            | 201  | 2.14 | 0.000 |
| Uhrf1     | ubiquitin-like, containing PHD and RING finger domains, 1                       | scl018140.7_263-S            | 2220 | 2.14 | 0.000 |
| Cckbr     | cholecystokinin B receptor                                                      | scl012426.5_191-S            | 1858 | 2.13 | 0.000 |
| Cdc6      | cell division cycle 6 homolog (S. cerevisiae)                                   | scl0023834.1_74-S            | 526  | 2.13 | 0.000 |
| NA        | 2610035D17Rik                                                                   | scl39368.13_542-S            | 395  | 2.13 | 0.000 |
| Rgs17     | regulator of G-protein signaling 17                                             | scl38240.6_287-S             | 594  | 2.13 | 0.000 |
| Dynl1     | dynein light chain LC8-type 1                                                   | scl056455.3_23-S             | 450  | 2.12 | 0.000 |
| Luzp5     | leucine zipper protein 5                                                        | scl076044.3_63-S             | 510  | 2.12 | 0.000 |
| NA        | similar to NADH-ubiquinone oxidoreductase ESSS subunit, mitochondrial precursor | GI_38083052-S                | 1642 | 2.12 | 0.000 |
| Atp6v0d1  | ATPase, H <sup>+</sup> transporting, lysosomal V0 subunit D1                    | scl000737.1_18-S             | 373  | 2.11 | 0.000 |
| Birc5     | baculoviral IAP repeat-containing 5                                             | scl0011799.1_42-S            | 370  | 2.11 | 0.000 |
| Emd       | emerin                                                                          | scl0002880.1_15-S            | 411  | 2.11 | 0.000 |

|               |                                                                                           |                                          |      |      |              |
|---------------|-------------------------------------------------------------------------------------------|------------------------------------------|------|------|--------------|
| NA            | similar to Mitochondrial import inner membrane translocase subunit TIM23                  | GI_38074106-S                            | 804  | 2.11 | <b>0.000</b> |
| Sfrs10        | splicing factor, arginine/serine-rich 10 (transformer 2 homolog, Drosophila)              | scl0001867.1_58-S                        | 453  | 2.11 | <b>0.000</b> |
| Tm9sf2        | transmembrane 9 superfamily member 2                                                      | scl000394.1_10-S                         | 196  | 2.11 | <b>0.000</b> |
| Yme111        | YME1-like 1 (S. cerevisiae)                                                               | scl0003089.1_75-S                        | 207  | 2.11 | <b>0.000</b> |
| 0610007L01Rik | RIKEN cDNA 0610007L01 gene                                                                | rij0610007L01 R000001M10 AK002297 1310-S | 1068 | 2.10 | <b>0.000</b> |
| 2010317E24Rik | RIKEN cDNA 2010317E24 gene                                                                | scl072080.6_214-S                        | 477  | 2.10 | <b>0.000</b> |
| Aspm          | asp (abnormal spindle)-like, microcephaly associated (Drosophila)                         | scl17394.26.1_66-S                       | 320  | 2.10 | <b>0.000</b> |
| Cxcl12        | chemokine (C-X-C motif) ligand 12                                                         | scl0001073.1_120-S                       | 471  | 2.10 | <b>0.000</b> |
| Fndc3a        | fibronectin type III domain containing 3a                                                 | scl00319448.2_96-S                       | 295  | 2.10 | <b>0.000</b> |
| Hirip3        | HIRA interacting protein 3                                                                | scl32046.5.1_83-S                        | 886  | 2.10 | <b>0.000</b> |
| Hspa5         | heat shock 70kD protein 5 (glucose-regulated protein)                                     | scl014828.8_22-S                         | 1578 | 2.10 | <b>0.000</b> |
| Cmas          | cytidine monophospho-N-acetylneuraminic acid synthetase                                   | scl29381.10.1_63-S                       | 1554 | 2.09 | <b>0.000</b> |
| Hnrpa3        | heterogeneous nuclear ribonucleoprotein A3                                                | scl0229279.5_20-S                        | 500  | 2.09 | <b>0.000</b> |
| Kdelr2        | KDEL (Lys-Asp-Glu-Leu) endoplasmic reticulum protein retention receptor 2                 | scl27015.4.1_35-S                        | 468  | 2.09 | <b>0.000</b> |
| NA            | 1810035L17Rik                                                                             | scl00380773.1_71-S                       | 1289 | 2.09 | <b>0.000</b> |
| Tcf19         | transcription factor 19                                                                   | scl49984.4.1_114-S                       | 826  | 2.09 | <b>0.000</b> |
| Tspan3        | tetraspanin 3                                                                             | scl0003580.1_5-S                         | 836  | 2.09 | <b>0.000</b> |
| Gnas          | GNAS (guanine nucleotide binding protein, alpha stimulating) complex locus                | scl0003148.1_1881-S                      | 403  | 2.08 | <b>0.000</b> |
| H13           | histocompatibility 13                                                                     | scl0003277.1_55-S                        | 317  | 2.08 | <b>0.000</b> |
| Mat2a         | methionine adenosyltransferase II, alpha                                                  | scl00232087.1_95-S                       | 399  | 2.08 | <b>0.000</b> |
| Pcmt1         | protein-L-isoaspartate (D-aspartate) O-methyltransferase 1                                | scl0003838.1_10-S                        | 424  | 2.08 | <b>0.000</b> |
| Ttc9b         | tetratricopeptide repeat domain 9B                                                        | scl073032.2_11-S                         | 229  | 2.08 | <b>0.000</b> |
| Ywhaq         | tyrosine 3-monooxygenase/tryptophan 5-monooxygenase activation protein, theta polypeptide | scl022630.1_91-S                         | 1645 | 2.08 | <b>0.000</b> |
| Gdi1          | guanosine diphosphate (GDP) dissociation inhibitor 1                                      | scl0014567.2_90-S                        | 211  | 2.07 | <b>0.000</b> |
| Hist1h2bj     | histone 1, H2bj                                                                           | scl0319183.1_124-S                       | 402  | 2.07 | <b>0.000</b> |
| Ifi27         | interferon, alpha-inducible protein 27                                                    | scl0076933.2_252-S                       | 294  | 2.07 | <b>0.000</b> |
| Mlf2          | myeloid leukemia factor 2                                                                 | scl29514.8.22_6-S                        | 532  | 2.07 | <b>0.000</b> |
| Tmed3         | transmembrane emp24 domain containing 3                                                   | scl35515.3_6-S                           | 1149 | 2.07 | <b>0.000</b> |
| Tmem32        | transmembrane protein 32                                                                  | scl54227.4_188-S                         | 423  | 2.07 | <b>0.000</b> |
| 2310005N03Rik | RIKEN cDNA 2310005N03 gene                                                                | scl066359.2_17-S                         | 994  | 2.06 | <b>0.000</b> |
| 9030625A04Rik | RIKEN cDNA 9030625A04 gene                                                                | scl45283.8.141_93-S                      | 326  | 2.06 | <b>0.000</b> |

|               |                                                                                                     |                                              |      |      |       |
|---------------|-----------------------------------------------------------------------------------------------------|----------------------------------------------|------|------|-------|
| Atp6v0e2      | ATPase, H <sup>+</sup> transporting, lysosomal V0 subunit E2                                        | scl0001036.1_14-S                            | 455  | 2.06 | 0.000 |
| Birc5         | baculoviral IAP repeat-containing 5                                                                 | scl011799.1_11-S                             | 689  | 2.06 | 0.000 |
| Calu          | calumenin                                                                                           | scl0001217.1_1480-S                          | 399  | 2.06 | 0.000 |
| Hist1h2bc     | histone 1, H2bc                                                                                     | scl44991.2.1_21-S                            | 1575 | 2.06 | 0.000 |
| Nudt19        | nudix (nucleoside diphosphate linked moiety X)-type motif 19                                        | scl31469.3.28_7-S                            | 738  | 2.06 | 0.000 |
| 1500041J02Rik | RIKEN cDNA 1500041J02 gene                                                                          | scl067876.4_28-S                             | 654  | 2.05 | 0.000 |
| 2810417H13Rik | RIKEN cDNA 2810417H13 gene                                                                          | scl36799.4_9-S                               | 527  | 2.05 | 0.000 |
| Hook1         | hook homolog 1 (Drosophila)                                                                         | scl0077963.1_19-S                            | 574  | 2.05 | 0.000 |
| Ifitm2        | interferon induced transmembrane protein 2                                                          | scl080876.2_10-S                             | 1152 | 2.05 | 0.000 |
| NA            | similar to RIKEN cDNA 2610524H06 gene                                                               | GI_38076908-S                                | 205  | 2.05 | 0.000 |
| Asns          | asparagine synthetase                                                                               | scl0001016.1_199-S                           | 394  | 2.04 | 0.000 |
| Hist1h2bm     | histone 1, H2bm                                                                                     | scl0319186.1_75-S                            | 488  | 2.04 | 0.000 |
| Hist1h3b      | histone 1, H3b                                                                                      | scl0319150.1_257-S                           | 284  | 2.04 | 0.000 |
| Mcm6          | minichromosome maintenance deficient 6 (MIS5 homolog, <i>S. pombe</i> )<br>( <i>S. cerevisiae</i> ) | scl000980.1_16-S                             | 645  | 2.04 | 0.000 |
| NA            | similar to Sid393p                                                                                  | GI_38085765-S                                | 794  | 2.04 | 0.000 |
| NA            | 1810026B05Rik                                                                                       | scl0069170.1_29-S                            | 1093 | 2.04 | 0.000 |
| Oact1         | O-acyltransferase (membrane bound) domain containing 1                                              | scl0218121.14_31-S                           | 710  | 2.04 | 0.000 |
| Pole          | polymerase (DNA directed), epsilon                                                                  | scl27442.47.1_8-S                            | 369  | 2.04 | 0.000 |
| 2900010J23Rik | RIKEN cDNA 2900010J23 gene                                                                          | scl19447.7.1_15-S                            | 879  | 2.03 | 0.000 |
| Incenp        | inner centromere protein                                                                            | scl52764.18.1_16-S                           | 425  | 2.03 | 0.000 |
| Neil3         | nei like 3 ( <i>E. coli</i> )                                                                       | ri A630055A13 PX00146D18 <br>AK042059 2077-S | 247  | 2.03 | 0.000 |
| Sfrs10        | splicing factor, arginine/serine-rich 10 (transformer 2 homolog,<br><i>Drosophila</i> )             | scl020462.9_41-S                             | 358  | 2.03 | 0.000 |
| Tyms          | thymidylate synthase                                                                                | scl0004133.1_1-S                             | 356  | 2.03 | 0.000 |
| Dut           | deoxyuridine triphosphatase                                                                         | scl20342.7_47-S                              | 365  | 2.02 | 0.000 |
| Kifc1         | kinesin family member C1                                                                            | scl0016580.1_17-S                            | 360  | 2.02 | 0.000 |
| Mrps6         | mitochondrial ribosomal protein S6                                                                  | scl0121022.3_149-S                           | 451  | 2.02 | 0.000 |
| NA            | RIKEN cDNA 1100001F19 gene                                                                          | GI_20878323-S                                | 477  | 2.02 | 0.000 |
| Smc111        | SMC (structural maintenance of chromosomes 1)-like 1<br>( <i>S. cerevisiae</i> )                    | scl54546.18_0-S                              | 206  | 2.02 | 0.000 |
| Taf10         | TAF10 RNA polymerase II, TATA box binding protein<br>(TBP)-associated factor                        | scl024075.4_0-S                              | 651  | 2.02 | 0.000 |
| Arf5          | ADP-ribosylation factor 5                                                                           | scl011844.1_12-S                             | 506  | 2.01 | 0.000 |
| BC031181      | cDNA sequence BC031181                                                                              | ri 5730496F02 PX00644L03 <br>AK077642 980-S  | 3503 | 2.01 | 0.000 |



|        |                                              |                    |      |      |              |
|--------|----------------------------------------------|--------------------|------|------|--------------|
| Dnm1l  | dynamamin 1-like                             | scl0074006.2_261-S | 300  | 2.01 | <b>0.000</b> |
| Eif4a2 | eukaryotic translation initiation factor 4A2 | scl0001779.1_17-S  | 2039 | 2.01 | <b>0.000</b> |
| Pdzd11 | PDZ domain containing 11                     | scl0002903.1_3-S   | 494  | 2.01 | <b>0.000</b> |
| Pfkip  | phosphofruktokinase, platelet                | scl0003623.1_49-S  | 556  | 2.01 | <b>0.001</b> |

---

<sup>1</sup> neuroendocrine protein genes are shown in bold; <sup>2</sup> p values < 0.05 are shown in bold

| Gene <sup>1</sup> | Description                                                                    | Probe set                                | Expression (mean) with TAg siRNA | Fold up-regulation +siRNA | P value <sup>2</sup> |
|-------------------|--------------------------------------------------------------------------------|------------------------------------------|----------------------------------|---------------------------|----------------------|
| Hrb2              | HIV-1 Rev binding protein 2                                                    | ri B230208M22 PX00069D07 AK045526 1152-S | 16035                            | 177.15                    | <b>0.000</b>         |
| 1810074P20Rik     | RIKEN cDNA 1810074P20 gene                                                     | scl24492.20.1_105-S                      | 16491                            | 73.45                     | <b>0.000</b>         |
| Slc7a3            | solute carrier family 7 (cationic amino acid transporter, y+ system), member 3 | scl53996.13.1_171-S                      | 3475                             | 9.17                      | <b>0.000</b>         |
| Trib3             | tribbles homolog 3 (Drosophila)                                                | scl18503.5_29-S                          | 1481                             | 8.49                      | <b>0.022</b>         |
| Crebbp            | CREB binding protein                                                           | scl48815.9.1_11-S                        | 531                              | 5.22                      | <b>0.000</b>         |
| Cacna2d1          | calcium channel, voltage-dependent, alpha2/delta subunit 1                     | scl012293.44_74-S                        | 1535                             | 4.93                      | <b>0.000</b>         |
| Nme7              | non-metastatic cells 7, protein expressed in                                   | scl000061.1_90_REVCOMP-S                 | 513                              | 4.44                      | <b>0.003</b>         |
| Bat2d             | BAT2 domain containing 1                                                       | ri 5730577G12 PX00093O15 AK030766 3541-S | 540                              | 4.21                      | <b>0.000</b>         |
| Eif4ebp1          | eukaryotic translation initiation factor 4E binding protein 1                  | scl013685.3_18-S                         | 1148                             | 4.03                      | <b>0.050</b>         |
| Ddx6              | DEAD (Asp-Glu-Ala-Asp) box polypeptide 6                                       | scl0003527.1_242-S                       | 1452                             | 4.00                      | <b>0.000</b>         |
| Slc6a9            | solute carrier family 6 (neurotransmitter transporter, glycine), member 9      | scl0014664.2_299-S                       | 661                              | 3.69                      | 0.063                |
| NA                | 2210401K01Rik                                                                  | scl072289.1_141-S                        | 507                              | 3.55                      | <b>0.003</b>         |
| Cox6a2            | cytochrome c oxidase, subunit VI a, polypeptide 2                              | scl30620.3.1_5-S                         | 350                              | 3.52                      | <b>0.003</b>         |
| Txnip             | thioredoxin interacting protein                                                | scl22856.7_28-S                          | 1743                             | 3.51                      | <b>0.000</b>         |
| Hyal2             | hyaluronoglucosaminidase 2                                                     | scl0015587.1_282-S                       | 890                              | 3.49                      | <b>0.000</b>         |
| Acox2             | acyl-Coenzyme A oxidase 2, branched chain                                      | scl45913.15.1_122-S                      | 424                              | 3.46                      | <b>0.038</b>         |
| Ankrd12           | ankyrin repeat domain 12                                                       | ri B230387C07 PX00161B10 AK046455 1022-S | 571                              | 3.45                      | <b>0.000</b>         |
| NA                | similar to hypothetical protein ORF-1137                                       | GI_38080768-S                            | 352                              | 3.39                      | <b>0.008</b>         |
| Itn2c             | integral membrane protein 2C                                                   | scl17725.6_585-S                         | 6741                             | 3.35                      | <b>0.000</b>         |
| NA                | NA                                                                             | scl0227620.1_20-S                        | 603                              | 3.26                      | <b>0.000</b>         |
| Bat2d             | BAT2 domain containing 1                                                       | ri 5730594E01 PX00093G24 AK077748 1826-S | 320                              | 3.22                      | <b>0.000</b>         |
| NA                | similar to hypothetical protein ORF-1137                                       | GI_38081436-S                            | 657                              | 3.18                      | <b>0.045</b>         |
| Ankrd11           | ankyrin repeat domain 11                                                       | ri B230386D16 PX00161H18 AK046451 1121-S | 324                              | 3.16                      | <b>0.000</b>         |
| Cd59a             | CD59a antigen                                                                  | scl20534.5_360-S                         | 1427                             | 3.15                      | <b>0.000</b>         |
| Klf3              | Kruppel-like factor 3 (basic)                                                  | scl0016599.2_295-S                       | 1689                             | 3.14                      | <b>0.000</b>         |
| Eif2c2            | eukaryotic translation initiation factor 2C, 2                                 | scl0239528.1_91-S                        | 399                              | 3.09                      | <b>0.000</b>         |
| D16Bwg1494e       | DNA segment, Chr 16, Brigham & Women's Genetics 1494 expressed                 | scl0224019.10_293-S                      | 701                              | 3.08                      | <b>0.000</b>         |

|               |                                                                            |                                          |       |      |              |
|---------------|----------------------------------------------------------------------------|------------------------------------------|-------|------|--------------|
| Tff3          | trefoil factor 3, intestinal                                               | scl50085.4.1_101-S                       | 968   | 3.06 | <b>0.000</b> |
| Spon2         | spondin 2, extracellular matrix protein                                    | scl26719.6_100-S                         | 4758  | 3.02 | <b>0.000</b> |
| Ppargc1a      | peroxisome proliferative activated receptor, gamma, coactivator 1 alpha    | scl26595.14.1_90-S                       | 1002  | 3.01 | <b>0.000</b> |
| Syne1         | synaptic nuclear envelope 1                                                | ri 4732422E11 PX00050F15 AK028641 2872-S | 271   | 2.99 | <b>0.013</b> |
| Zbtb7a        | zinc finger and BTB domain containing 7a                                   | scl0016969.1_242-S                       | 381   | 2.97 | <b>0.000</b> |
| Aldh6a1       | aldehyde dehydrogenase family 6, subfamily A1                              | scl42244.15_187-S                        | 1069  | 2.94 | <b>0.000</b> |
| NA            | NA                                                                         | mtDNA_ND6-S                              | 292   | 2.90 | <b>0.000</b> |
| Cpd           | carboxypeptidase D                                                         | scl39908.21.1_34-S                       | 393   | 2.88 | <b>0.000</b> |
| Hbp1          | high mobility group box transcription factor 1                             | scl0002413.1_735-S                       | 545   | 2.86 | <b>0.000</b> |
| NA            | similar to Ab2-162                                                         | GI_38080226-S                            | 5648  | 2.86 | <b>0.000</b> |
| NA            | ORF1 (LOC386112)                                                           | GI_38081157-S                            | 591   | 2.86 | <b>0.029</b> |
| Btbd3         | BTB (POZ) domain containing 3                                              | scl00228662.1_52-S                       | 418   | 2.81 | 0.091        |
| Phf10         | PHD finger protein 10                                                      | scl50289.12.1_79-S                       | 2168  | 2.81 | <b>0.001</b> |
| NA            | 1110046J11Rik                                                              | scl1329.1.1_99-S                         | 561   | 2.80 | <b>0.000</b> |
| Cln2          | ceroid-lipofuscinosis, neuronal 2                                          | scl30879.11_205-S                        | 576   | 2.80 | <b>0.000</b> |
| NA            | similar to hypothetical protein ORF-1137                                   | GI_38081412-S                            | 283   | 2.77 | <b>0.017</b> |
| Gnas          | GNAS (guanine nucleotide binding protein, alpha stimulating) complex locus | scl071358.8_30-S                         | 530   | 2.76 | 0.100        |
| Ggnbp1        | gametogenetin binding protein 1                                            | scl0070772.1_306-S                       | 413   | 2.75 | <b>0.000</b> |
| Gstm1         | glutathione S-transferase, mu 1                                            | scl014862.2_242-S                        | 689   | 2.74 | <b>0.000</b> |
| Npc1          | Niemann Pick type C1                                                       | scl51647.25_267-S                        | 1255  | 2.74 | <b>0.000</b> |
| Cpd           | carboxypeptidase D                                                         | scl0012874.1_259-S                       | 312   | 2.73 | <b>0.010</b> |
| Slc16a9       | solute carrier family 16 (monocarboxylic acid transporters), member 9      | scl38793.6_454-S                         | 300   | 2.73 | <b>0.000</b> |
| NA            | similar to RNP particle component                                          | GI_38081272-S                            | 974   | 2.71 | 0.099        |
| <b>Calca</b>  | calcitonin/calcitonin-related polypeptide, alpha                           | scl0012310.2_237-S                       | 14398 | 2.70 | <b>0.000</b> |
| Phf10         | PHD finger protein 10                                                      | scl000091.1_88-S                         | 2183  | 2.69 | <b>0.001</b> |
| Retsat        | retinol saturase (all trans retinol 13,14 reductase)                       | scl29880.12.1_23-S                       | 2195  | 2.67 | <b>0.000</b> |
| A930034L06Rik | RIKEN cDNA A930034L06 gene                                                 | scl20001.6.1_12-S                        | 506   | 2.66 | <b>0.012</b> |
| NA            | RIKEN cDNA 3300001A09 gene                                                 | scl36783.2.1_280-S                       | 5664  | 2.65 | <b>0.000</b> |
| NA            | 6430709H04Rik                                                              | scl0319228.4_13-S                        | 174   | 2.64 | 0.218        |
| Stat3         | signal transducer and activator of transcription 3                         | scl020848.1_5-S                          | 1700  | 2.64 | <b>0.000</b> |
| Ephx1         | epoxide hydrolase 1, microsomal                                            | scl15839.11.1_64-S                       | 909   | 2.61 | <b>0.000</b> |
| Slc35d3       | NA                                                                         | scl38150.2.1_277-S                       | 2283  | 2.61 | <b>0.000</b> |

|               |                                                                                                                   |                                          |       |      |              |
|---------------|-------------------------------------------------------------------------------------------------------------------|------------------------------------------|-------|------|--------------|
| 5730593F17Rik | RIKEN cDNA 5730593F17 gene                                                                                        | scl41013.18_227-S                        | 737   | 2.59 | <b>0.000</b> |
| Bbx           | bobby sox homolog (Drosophila)                                                                                    | scl48409.23_594-S                        | 548   | 2.59 | <b>0.000</b> |
| Rbm5          | RNA binding motif protein 5                                                                                       | scl0003447.1_0-S                         | 699   | 2.57 | <b>0.020</b> |
| Man2a1        | mannosidase 2, alpha 1                                                                                            | scl50565.20_286-S                        | 970   | 2.55 | <b>0.000</b> |
| NA            | RIKEN cDNA D330001F17 gene                                                                                        | scl00223658.1_328-S                      | 2283  | 2.54 | <b>0.000</b> |
| NA            | RIKEN cDNA 3010027A04 gene                                                                                        | scl34205.11.307_7-S                      | 402   | 2.52 | <b>0.000</b> |
| Impact        | imprinted and ancient                                                                                             | scl016210.11_31-S                        | 707   | 2.52 | <b>0.000</b> |
| Nup210        | nucleoporin 210                                                                                                   | scl28688.42_395-S                        | 2991  | 2.52 | <b>0.000</b> |
| Usp37         | ubiquitin specific peptidase 37                                                                                   | scl0319600.1_233-S                       | 402   | 2.52 | <b>0.000</b> |
| Nupr1         | nuclear protein 1                                                                                                 | scl30680.4.1_44-S                        | 9774  | 2.51 | <b>0.015</b> |
| 2310022B05Rik | RIKEN cDNA 2310022B05 gene                                                                                        | scl34177.5_600-S                         | 714   | 2.50 | <b>0.000</b> |
| Entpd3        | ectonucleoside triphosphate diphosphohydrolase 3                                                                  | scl36335.20.967_4-S                      | 4182  | 2.50 | <b>0.000</b> |
| Pdcd4         | programmed cell death 4                                                                                           | scl52979.12_115-S                        | 1954  | 2.50 | <b>0.000</b> |
| Atf5          | activating transcription factor 5                                                                                 | scl31408.4_131-S                         | 1632  | 2.49 | <b>0.001</b> |
| Cdkn2b        | cyclin-dependent kinase inhibitor 2B (p15, inhibits CDK4)                                                         | scl24120.2_589-S                         | 1764  | 2.49 | <b>0.000</b> |
| Adamts9       | Adamts9 Mus musculus a disintegrin-like and metalloprotease (reprolysin type) with thrombospondin type 1 motif, 9 | scl28665.23.1_62-S                       | 475   | 2.49 | <b>0.000</b> |
| Robo1         | roundabout homolog 1 (Drosophila)                                                                                 | scl019876.3_41-S                         | 785   | 2.49 | <b>0.000</b> |
| Ankhd1        | NA                                                                                                                | scl00108857.1_273-S                      | 299   | 2.48 | <b>0.000</b> |
| Map3k7ip2     | mitogen-activated protein kinase kinase kinase 7 interacting protein 2                                            | scl38232.7_17-S                          | 675   | 2.47 | <b>0.004</b> |
| Pcsk9         | proprotein convertase subtilisin/kexin type 9                                                                     | scl24041.13_589-S                        | 398   | 2.47 | <b>0.000</b> |
| Dag1          | dystroglycan 1                                                                                                    | scl013138.1_18-S                         | 903   | 2.44 | <b>0.000</b> |
| Otub2         | OTU domain, ubiquitin aldehyde binding 2                                                                          | scl0068149.1_319-S                       | 307   | 2.43 | <b>0.047</b> |
| 1200015N20Rik | RIKEN cDNA 1200015N20 gene                                                                                        | scl0071721.2_141-S                       | 477   | 2.42 | <b>0.000</b> |
| Abcb4         | ATP-binding cassette, sub-family B (MDR/TAP), member 4                                                            | scl26912.28.1_161-S                      | 419   | 2.42 | <b>0.000</b> |
| NA            | similar to RNP particle component (LOC386124)                                                                     | GI_38081206-S                            | 336   | 2.42 | 0.090        |
| Bat2d         | BAT2 domain containing 1                                                                                          | ri 2900060F21 ZX00069K04 AK013732 1657-S | 255   | 2.39 | <b>0.016</b> |
| Ccng1         | cyclin G1                                                                                                         | scl40331.6_57-S                          | 2346  | 2.38 | <b>0.000</b> |
| Rims3         | regulating synaptic membrane exocytosis 3                                                                         | scl25010.7_694-S                         | 1306  | 2.38 | <b>0.000</b> |
| Tnrc6b        | trinucleotide repeat containing 6b                                                                                | ri C130089M10 PX00172G11 AK048628 1520-S | 262   | 2.38 | <b>0.016</b> |
| Akap8l        | A kinase (PRKA) anchor protein 8-like                                                                             | scl054194.1_276-S                        | 953   | 2.37 | <b>0.000</b> |
| Bri3          | brain protein I3                                                                                                  | scl21206.2.1_228-S                       | 1888  | 2.37 | <b>0.000</b> |
| Dusp5         | dual specificity phosphatase 5                                                                                    | GI_38085196-S                            | 781   | 2.37 | <b>0.000</b> |
| Srr           | serine racemase                                                                                                   | ri B230334I23 PX00316P06 AK080830 1280-S | 10002 | 2.37 | <b>0.000</b> |

|               |                                                              |                       |      |      |              |
|---------------|--------------------------------------------------------------|-----------------------|------|------|--------------|
| Bax           | Bcl2-associated X protein                                    | scl31374.5.1_14-S     | 520  | 2.36 | <b>0.000</b> |
| Hbp1          | high mobility group box transcription factor 1               | scl42553.13_222-S     | 497  | 2.36 | <b>0.000</b> |
| 6330514A18Rik | RIKEN cDNA 6330514A18 gene                                   | scl38681.14.1_267-S   | 1202 | 2.35 | <b>0.000</b> |
| Lasp1         | LIM and SH3 protein 1                                        | scl0016796.1_242-S    | 1453 | 2.35 | <b>0.000</b> |
| NA            | similar to matrin cyclophilin (matrin-cyp)                   | GI_38093603-S         | 508  | 2.35 | <b>0.000</b> |
| Rorc          | RAR-related orphan receptor gamma                            | scl019885.11_24-S     | 275  | 2.35 | <b>0.000</b> |
| Slc35f3       | solute carrier family 35, member F3                          | scl33165.11.1_4-S     | 405  | 2.35 | <b>0.001</b> |
| Renbp         | renin binding protein                                        | scl54150.7.1_69-S     | 626  | 2.34 | <b>0.000</b> |
| Cdkn1b        | cyclin-dependent kinase inhibitor 1B (P27)                   | scl012576.2_22-S      | 285  | 2.33 | <b>0.036</b> |
| Naprt1        | nicotinate phosphoribosyltransferase domain containing 1     | scl47060.10.1_13-S    | 972  | 2.33 | <b>0.000</b> |
| Csad          | cysteine sulfinic acid decarboxylase                         | scl0246277.1_158-S    | 661  | 2.32 | <b>0.000</b> |
| Frk           | fyn-related kinase                                           | scl39029.8_154-S      | 598  | 2.31 | <b>0.000</b> |
| NA            | C630022N07Rik                                                | scl0319360.1_291-S    | 856  | 2.31 | <b>0.000</b> |
| Cln5          | ceroid-lipofuscinosis, neuronal 5                            | scl46010.5_526-S      | 2532 | 2.31 | <b>0.000</b> |
| NA            | DNA segment, Chr 5, Brigham & Womens Genetics 0860 expressed | scl0052822.2_239-S    | 1444 | 2.31 | <b>0.006</b> |
| Stat3         | signal transducer and activator of transcription 3           | scl0020848.1_188-S    | 861  | 2.31 | <b>0.000</b> |
| NA            | RIKEN cDNA 2310004N11 gene                                   | scl074178.11_191-S    | 1075 | 2.30 | <b>0.000</b> |
| Supt3h        | suppressor of Ty 3 homolog (S. cerevisiae)                   | scl50694.13.20_68-S   | 1431 | 2.30 | <b>0.000</b> |
| Akap9         | A kinase (PRKA) anchor protein (yotiao) 9                    | scl0100986.1_13-S     | 624  | 2.29 | <b>0.000</b> |
| 2010315L10Rik | RIKEN cDNA 2010315L10 gene                                   | scl33705.5.1_110-S    | 2138 | 2.28 | <b>0.000</b> |
| Myst4         | MYST histone acetyltransferase monocytic leukemia 4          | scl0054169.1_231-S    | 368  | 2.28 | <b>0.000</b> |
| Stard5        | StAR-related lipid transfer (START) domain containing 5      | scl00170460.2_242-S   | 255  | 2.28 | <b>0.001</b> |
| Zfp365        | zinc finger protein 365                                      | scl37856.7_341-S      | 586  | 2.28 | <b>0.000</b> |
| Klf6          | Kruppel-like factor 6                                        | scl023849.4_8-S       | 556  | 2.27 | <b>0.000</b> |
| Nmb           | neuromedin B                                                 | scl068039.2_3-S       | 700  | 2.27 | <b>0.000</b> |
| Noxo1         | NADPH oxidase organizer 1                                    | scl51008.5.1_229-S    | 350  | 2.27 | <b>0.000</b> |
| Ddit3         | DNA-damage inducible transcript 3                            | scl38324.4.1_0-S      | 375  | 2.26 | <b>0.002</b> |
| NA            | similar to hypothetical protein ORF-1137                     | GI_38080884-S         | 283  | 2.26 | <b>0.035</b> |
| Slc19a2       | solute carrier family 19 (thiamine transporter), member 2    | scl17283.6_608-S      | 667  | 2.26 | <b>0.000</b> |
| Soat1         | sterol O-acyltransferase 1                                   | scl020652.2_90-S      | 311  | 2.26 | <b>0.000</b> |
| Zbtb12        | zinc finger and BTB domain containing 12                     | scl50802.2_363-S      | 446  | 2.25 | <b>0.000</b> |
| Cdkn1a        | cyclin-dependent kinase inhibitor 1A (P21)                   | scl012575.1_2-S       | 925  | 2.24 | <b>0.000</b> |
| NA            | RIKEN cDNA 2410012C07 gene                                   | scl076484.1_294-S     | 4152 | 2.24 | <b>0.000</b> |
| NA            | 5430417L22Rik                                                | scl20442.1.104_164-S  | 1058 | 2.24 | <b>0.000</b> |
| Csnk1g1       | casein kinase 1, gamma 1                                     | scl36794.1.1108_240-S | 326  | 2.23 | <b>0.000</b> |
| NA            | NM_029895.3                                                  | scl21235.24_380-S     | 1309 | 2.23 | <b>0.000</b> |

|               |                                                                                                   |                                          |       |      |              |
|---------------|---------------------------------------------------------------------------------------------------|------------------------------------------|-------|------|--------------|
| Aplp2         | amyloid beta (A4) precursor-like protein 2                                                        | scl36067.18_4-S                          | 10188 | 2.22 | <b>0.000</b> |
| Lmo4          | LIM domain only 4                                                                                 | scl21429.6_290-S                         | 2918  | 2.22 | <b>0.000</b> |
| Mgst2         | microsomal glutathione S-transferase 2                                                            | scl23214.8.1_66-S                        | 403   | 2.22 | <b>0.000</b> |
| Rxrb          | retinoid X receptor beta                                                                          | scl020182.9_313-S                        | 845   | 2.22 | <b>0.000</b> |
| Smarca1       | SWI/SNF related, matrix associated, actin dependent regulator of chromatin, subfamily a, member 1 | scl54295.26.1_21-S                       | 867   | 2.22 | <b>0.000</b> |
| Stk32a        | serine/threonine kinase 32A                                                                       | scl00269019.2_280-S                      | 505   | 2.22 | <b>0.000</b> |
| C530014P21Rik | RIKEN cDNA C530014P21 gene                                                                        | ri D630024O03 PX00197J13 AK085434 1298-S | 247   | 2.21 | <b>0.026</b> |
| NA            | similar to hypothetical protein ORF-1137                                                          | GI_38081284-S                            | 236   | 2.21 | <b>0.042</b> |
| Gnpda2        | Mus musculus glucosamine-6-phosphate deaminase 2                                                  | scl0067980.2_203-S                       | 427   | 2.21 | <b>0.000</b> |
| NA            | RIKEN cDNA 4933421G18 gene                                                                        | scl071175.1_21-S                         | 907   | 2.21 | <b>0.000</b> |
| Pdcd4         | programmed cell death 4                                                                           | scl0018569.1_4-S                         | 1017  | 2.21 | <b>0.000</b> |
| Ppm1l         | protein phosphatase 1 (formerly 2C)-like                                                          | scl23092.5_223-S                         | 259   | 2.21 | <b>0.000</b> |
| Fbxo6b        | F-box only protein 6b                                                                             | scl23523.7.1_20-S                        | 729   | 2.20 | <b>0.000</b> |
| Grb7          | growth factor receptor bound protein 7                                                            | scl40936.14_9-S                          | 3131  | 2.20 | <b>0.000</b> |
| Ppp1r3c       | protein phosphatase 1, regulatory (inhibitor) subunit 3C                                          | scl52526.2_193-S                         | 384   | 2.20 | <b>0.000</b> |
| Thsd4         | thrombospondin, type I, domain containing 4                                                       | scl35747.13.1_171-S                      | 273   | 2.20 | <b>0.000</b> |
| Tmem23        | transmembrane protein 23                                                                          | scl52550.23_145-S                        | 445   | 2.20 | <b>0.000</b> |
| Gcc2          | GRIP and coiled-coil domain containing 2                                                          | ri 2600014C01 ZX00060D21 AK011206 858-S  | 229   | 2.19 | <b>0.011</b> |
| Scamp5        | secretory carrier membrane protein 5                                                              | scl35792.9_485-S                         | 3418  | 2.19 | <b>0.000</b> |
| 1200016E24Rik | RIKEN cDNA 1200016E24 gene                                                                        | ri 4833436O22 PX00028P19 AK029441 2683-S | 504   | 2.18 | <b>0.000</b> |
| 4931429I11Rik | RIKEN cDNA 4931429I11 gene                                                                        | scl0003510.1_178-S                       | 235   | 2.18 | <b>0.000</b> |
| Wbscr16       | Williams-Beuren syndrome chromosome region 16 homolog (human)                                     | scl25953.10_428-S                        | 390   | 2.18 | <b>0.000</b> |
| 2310015B20Rik | RIKEN cDNA 2310015B20 gene                                                                        | scl38794.5.1_91-S                        | 807   | 2.17 | <b>0.000</b> |
| LOC213480     | similar to RIKEN cDNA C920008G01 gene                                                             | GI_38076290-S                            | 931   | 2.17 | <b>0.050</b> |
| Noxo1         | NADPH oxidase organizer 1                                                                         | scl0001724.1_23-S                        | 292   | 2.17 | <b>0.000</b> |
| Por           | P450 (cytochrome) oxidoreductase                                                                  | scl018984.16_308-S                       | 476   | 2.17 | <b>0.000</b> |
| Pros1         | protein S (alpha)                                                                                 | scl49002.15_178-S                        | 1077  | 2.17 | <b>0.000</b> |
| Gria3         | glutamate receptor, ionotropic, AMPA3 (alpha 3)                                                   | scl8260.1.1_298-S                        | 324   | 2.16 | <b>0.000</b> |
| Gtf2h4        | general transcription factor II H, polypeptide 4                                                  | scl49981.15.1_56-S                       | 869   | 2.16 | <b>0.000</b> |
| Llg1          | lethal giant larvae homolog 1 (Drosophila)                                                        | scl41479.21_1-S                          | 618   | 2.16 | <b>0.000</b> |
| Nfatc3        | nuclear factor of activated T-cells, cytoplasmic, calcineurin-dependent 3                         | scl33393.12_260-S                        | 590   | 2.16 | <b>0.000</b> |
| Ypel5         | yippee-like 5 (Drosophila)                                                                        | scl0383295.3_18-S                        | 873   | 2.16 | <b>0.000</b> |
| Akt2          | thymoma viral proto-oncogene 2                                                                    | scl32891.21_547-S                        | 342   | 2.15 | <b>0.000</b> |

|               |                                                                                                                                             |                                         |      |      |              |
|---------------|---------------------------------------------------------------------------------------------------------------------------------------------|-----------------------------------------|------|------|--------------|
| Lrrc35        | leucine rich repeat containing 35                                                                                                           | scl35981.11_448-S                       | 1053 | 2.15 | <b>0.000</b> |
| Rbpms         | RNA binding protein gene with multiple splicing                                                                                             | scl34939.16_10-S                        | 266  | 2.15 | <b>0.000</b> |
| Slc1a4        | solute carrier family 1 (glutamate/neutral amino acid transporter), member 4                                                                | scl40472.8_474-S                        | 2086 | 2.15 | <b>0.004</b> |
| Snx30         | sorting nexin family member 30                                                                                                              | scl00209131.1_196-S                     | 266  | 2.15 | <b>0.000</b> |
| Zzef1         | zinc finger, ZZ-type with EF hand domain 1                                                                                                  | scl0195018.6_13-S                       | 400  | 2.15 | <b>0.000</b> |
| 3300001P08Rik | RIKEN cDNA 3300001P08 gene                                                                                                                  | scl067684.2_37-S                        | 1533 | 2.14 | <b>0.003</b> |
| 5830434P21Rik | RIKEN cDNA 5830434P21 gene                                                                                                                  | scl21064.31_2-S                         | 1977 | 2.14 | <b>0.000</b> |
| Il6ra         | interleukin 6 receptor, alpha                                                                                                               | ri 9530096I01 PX00114B19 AK020663 941-S | 246  | 2.14 | <b>0.000</b> |
| Mll1          | myeloid/lymphoid or mixed-lineage leukemia 1                                                                                                | scl35942.36_189-S                       | 1956 | 2.14 | <b>0.000</b> |
| Sltm          | SAFB-like, transcription modulator                                                                                                          | scl066660.3_29-S                        | 698  | 2.14 | <b>0.000</b> |
| Tmem51        | transmembrane protein 51                                                                                                                    | scl0214359.1_299-S                      | 754  | 2.14 | <b>0.000</b> |
| Bcl11a        | B-cell CLL/lymphoma 11A (zinc finger protein)                                                                                               | scl0001352.1_150-S                      | 415  | 2.13 | <b>0.000</b> |
| D0H4S114      | DNA segment, human D4S114                                                                                                                   | scl51556.7_209-S                        | 635  | 2.13 | <b>0.000</b> |
| Eif3s1        | eukaryotic translation initiation factor 3, subunit 1 alpha                                                                                 | ri 2700079K05 ZX00082L10 AK019219 263-S | 344  | 2.13 | <b>0.000</b> |
| NA            | 6230400G14Rik                                                                                                                               | scl28675.1.1_200-S                      | 559  | 2.13 | <b>0.000</b> |
| NA            | NA                                                                                                                                          | scl000034.1_162_REVCOMP-S               | 237  | 2.12 | <b>0.000</b> |
| NA            | RIKEN cDNA 2810455F06 gene                                                                                                                  | scl0227570.7_253-S                      | 874  | 2.12 | <b>0.000</b> |
| NA            | 1110003O08Rik                                                                                                                               | scl34240.1.561_330-S                    | 719  | 2.12 | <b>0.000</b> |
| Pdpk1         | 3-phosphoinositide dependent protein kinase-1                                                                                               | scl50221.17.1_145-S                     | 596  | 2.12 | <b>0.000</b> |
| 2810037C14Rik | RIKEN cDNA 2810037C14 gene                                                                                                                  | scl067211.6_180-S                       | 740  | 2.11 | <b>0.000</b> |
| Atbf1         | AT motif binding factor 1                                                                                                                   | scl011906.16_208-S                      | 892  | 2.11 | <b>0.000</b> |
| Chac1         | ChaC, cation transport regulator-like 1 (E. coli)                                                                                           | scl20421.3_574-S                        | 856  | 2.11 | 0.173        |
| Acadsb        | acyl-Coenzyme A dehydrogenase, short/branched chain                                                                                         | scl0066885.2_329-S                      | 2038 | 2.10 | <b>0.000</b> |
| Dag1          | dystroglycan 1                                                                                                                              | scl35355.5_339-S                        | 807  | 2.10 | <b>0.000</b> |
| NA            | similar to RNP particle component (LOC386169)                                                                                               | GI_38081258-S                           | 237  | 2.10 | <b>0.008</b> |
| NA            | RIKEN cDNA 5830416A07 gene                                                                                                                  | scl076014.3_8-S                         | 663  | 2.10 | <b>0.000</b> |
| Sema5a        | sema domain, seven thrombospondin repeats (type 1 and type 1-like), transmembrane domain (TM) and short cytoplasmic domain, (semaphorin) 5A | scl0020356.1_230-S                      | 386  | 2.10 | <b>0.000</b> |
| Tsta3         | tissue specific transplantation antigen P35B                                                                                                | scl47056.10.1_17-S                      | 1403 | 2.10 | <b>0.000</b> |
| Irf2          | interferon regulatory factor 2                                                                                                              | scl33841.11_453-S                       | 1115 | 2.09 | <b>0.000</b> |
| NA            | 6330509M05Rik                                                                                                                               | scl7210.1.1_253-S                       | 1308 | 2.09 | <b>0.000</b> |
| 2600005C20Rik | RIKEN cDNA 2600005C20 gene                                                                                                                  | scl072462.6_25-S                        | 327  | 2.08 | <b>0.000</b> |
| Blcap         | bladder cancer associated protein homolog (human)                                                                                           | scl18420.2_47-S                         | 624  | 2.08 | <b>0.000</b> |

|               |                                                                                                            |                                           |      |      |              |
|---------------|------------------------------------------------------------------------------------------------------------|-------------------------------------------|------|------|--------------|
| Lrrn1         | leucine rich repeat protein 1, neuronal                                                                    | scl29678.2_366-S                          | 663  | 2.08 | <b>0.000</b> |
| NA            | RIKEN cDNA 5830407P18 gene                                                                                 | scl0078818.1_318-S                        | 239  | 2.08 | <b>0.039</b> |
| Smarcd2       | SWI/SNF related, matrix associated, actin dependent regulator of chromatin, subfamily d, member 2          | scl083796.1_300-S                         | 1432 | 2.07 | <b>0.000</b> |
| 5730509C05Rik | RIKEN cDNA 5730509C05 gene                                                                                 | scl40925.4.3563_8-S                       | 407  | 2.06 | 0.105        |
| Ap1b1         | adaptor protein complex AP-1, beta 1 subunit                                                               | scl011764.20_169-S                        | 2376 | 2.06 | <b>0.000</b> |
| Mrps34        | mitochondrial ribosomal protein S34                                                                        | scl50998.1_28-S                           | 1874 | 2.06 | <b>0.000</b> |
| NA            | RIKEN cDNA 1200003E16 gene                                                                                 | scl066860.1_6-S                           | 665  | 2.06 | <b>0.000</b> |
| NA            | A830080H07Rik                                                                                              | scl37344.1.417_0-S                        | 1036 | 2.06 | <b>0.000</b> |
| NA            | cDNA sequence BC003940                                                                                     | scl39231.4_382-S                          | 1628 | 2.06 | <b>0.000</b> |
| Prkirr        | protein-kinase, interferon-inducible double stranded RNA dependent inhibitor, repressor of (P58 repressor) | scl0072981.1_191-S                        | 561  | 2.06 | <b>0.000</b> |
| Slc25a28      | solute carrier family 25, member 28                                                                        | scl52458.4_47-S                           | 1059 | 2.06 | <b>0.000</b> |
| Slc7a14       | solute carrier family 7 (cationic amino acid transporter, y+ system), member 14                            | scl00241919.1_47-S                        | 296  | 2.06 | <b>0.000</b> |
| Tcof1         | Treacher Collins Franceschetti syndrome 1, homolog                                                         | scl0021453.2_208-S                        | 608  | 2.06 | <b>0.000</b> |
| 1810027O10Rik | RIKEN cDNA 1810027O10 gene                                                                                 | scl41358.1_245-S                          | 6304 | 2.04 | <b>0.000</b> |
| NA            | similar to KIAA1731 protein                                                                                | GI_38090253-S                             | 299  | 2.04 | <b>0.000</b> |
| Mtap2         | microtubule-associated protein 2                                                                           | rij A330078K03 PX00133N11 AK079618 3541-S | 213  | 2.04 | 0.060        |
| NA            | 2310040A07Rik                                                                                              | scl24418.2_44-S                           | 566  | 2.04 | <b>0.000</b> |
| NA            | 1810027I20Rik                                                                                              | scl26483.7_409-S                          | 291  | 2.04 | <b>0.000</b> |
| NA            | E330039G21Rik                                                                                              | scl40721.18.1_28-S                        | 332  | 2.04 | <b>0.000</b> |
| Pacs1         | phosphofurin acidic cluster sorting protein 1                                                              | scl53489.23_479-S                         | 634  | 2.04 | <b>0.000</b> |
| Odz3          | odd Oz/ten-m homolog 3 (Drosophila)                                                                        | scl0023965.1_142-S                        | 462  | 2.04 | <b>0.000</b> |
| Pclo          | piccolo (presynaptic cytomatrix protein)                                                                   | scl0026875.1_310-S                        | 755  | 2.04 | <b>0.000</b> |
| Tjp1          | tight junction protein 1                                                                                   | scl31237.29_375-S                         | 326  | 2.04 | <b>0.031</b> |
| Mtap1b        | microtubule-associated protein 1 B                                                                         | scl017755.1_80-S                          | 481  | 2.03 | <b>0.017</b> |
| NA            | similar to hypothetical protein ORF-1137                                                                   | GI_38081151-S                             | 218  | 2.03 | <b>0.008</b> |
| Gnai1         | guanine nucleotide binding protein, alpha inhibiting 1                                                     | scl014677.2_17-S                          | 282  | 2.03 | <b>0.000</b> |
| Ptprd         | protein tyrosine phosphatase, receptor type, D                                                             | scl070222.2_44-S                          | 697  | 2.03 | <b>0.000</b> |
| Trp53inp1     | transformation related protein 53 inducible nuclear protein 1                                              | scl25678.6_114-S                          | 472  | 2.03 | <b>0.000</b> |
| Zzz3          | zinc finger, ZZ domain containing 3                                                                        | scl22447.5.1_50-S                         | 201  | 2.03 | <b>0.000</b> |
| C530044N13Rik | RIKEN cDNA C530044N13 gene                                                                                 | scl48750.6_548-S                          | 1159 | 2.02 | <b>0.000</b> |
| Fvt1          | follicular lymphoma variant translocation 1                                                                | scl16414.9.494_144-S                      | 523  | 2.02 | <b>0.000</b> |
| Mt2           | metallothionein 2                                                                                          | scl33493.3.1_90-S                         | 678  | 2.02 | <b>0.000</b> |



|               |                                                             |                      |      |      |              |
|---------------|-------------------------------------------------------------|----------------------|------|------|--------------|
| NA            | hypothetical protein A730098P15                             | scl0209012.1_266-S   | 262  | 2.02 | <b>0.004</b> |
| Sharpin       | SHANK-associated RH domain interacting protein              | scl47044.6.24_75-S   | 1569 | 2.02 | <b>0.000</b> |
| 9930021J03Rik | RIKEN cDNA 9930021J03 gene                                  | scl52589.1_716-S     | 307  | 2.01 | <b>0.000</b> |
| Adra2a        | adrenergic receptor, alpha 2a                               | scl52981.3.767_203-S | 1185 | 2.01 | <b>0.000</b> |
| Camk4         | calcium/calmodulin-dependent protein kinase IV              | scl15233.1.1_225-S   | 297  | 2.01 | <b>0.000</b> |
| Ddit4l        | DNA-damage-inducible transcript 4-like                      | scl22560.5_561-S     | 1451 | 2.01 | <b>0.000</b> |
| Flcn          | folliculin                                                  | scl40154.14_234-S    | 1017 | 2.01 | <b>0.000</b> |
| Mdm2          | transformed mouse 3T3 cell double minute 2                  | scl37463.11_46-S     | 1726 | 2.01 | <b>0.000</b> |
| Pdap1         | PDGFA associated protein 1                                  | scl25784.5.1_54-S    | 1341 | 2.01 | <b>0.003</b> |
| NA            | A730017D01Rik                                               | scl28224.2_30-S      | 569  | 2.01 | <b>0.000</b> |
| NA            | RIKEN cDNA D430042O09 gene                                  | scl32066.25_84-S     | 782  | 2.01 | <b>0.000</b> |
| Rbms3         | RNA binding motif, single stranded interacting protein      | scl35242.18_241-S    | 591  | 2.01 | <b>0.001</b> |
| Tap2          | transporter 2, ATP-binding cassette, sub-family B (MDR/TAP) | scl50827.12.1_175-S  | 518  | 2.01 | <b>0.000</b> |

<sup>1</sup> neuroendocrine protein genes are shown in bold; <sup>2</sup> p values < 0.05 are shown in bold
