# Supplementary material for: Expression of a Neuroendocrine Gene Signature in Gastric Tumor Cells from CEA 424-SV40 Large T Antigen-Transgenic Mice Depends on SV40 Large T Antigen
Source: PubMed Central journal article supplement (PMC3258231; doi:10.1371/journal.pone.0029846), 2012-01-13
Supplement: pone.0029846.s006.pdf [file pone.0029846.s006.pdf]

**Table S5: Neuroendocrine phenotype in SV40-TAg-transgenic mouse tumor models**

| Mouse strain                             | promoter (size/location relative to translational start) | tumor location                | classification                            | evidence for classification of tumor (marker)                                           | reference                                   |
|------------------------------------------|----------------------------------------------------------|-------------------------------|-------------------------------------------|-----------------------------------------------------------------------------------------|---------------------------------------------|
| <i>neuroendocrine tumors</i>             |                                                          |                               |                                           |                                                                                         |                                             |
| CEA424-SV40 TAg                          | human <i>CEACAM5</i> (424 bp)                            | antrum                        | neuroendocrine tumor                      | transcriptome analysis; electron microscopy; immunohistology (CGHA); serotonin in blood | this paper                                  |
| Kit-SV40 TAg                             | mouse <i>Kit</i>                                         | multiple (pituitary, thyroid) | neuroendocrine tumor                      | immunohistology (CGHA, ENO2)                                                            | Bosse et al. 1997                           |
| Vil-Cre-ER <sup>T2</sup> x LoxP-SV40 TAg | murine <i>Vil1</i> (9 kb)                                | colon                         | neuroendocrine tumor, glandular carcinoma | immunohistology (SYP)                                                                   | Czeh et al. 2010                            |
| CR2-SV40 TAg                             | mouse <i>Defa2/cryptdin-2</i> (6.5 kb)                   | prostate                      | neuroendocrine tumor                      | immunohistology (CHGA, SYP)                                                             | Garabedian et al. 1998                      |
| rPB-SV40 TAg                             | rat <i>Pbsn</i> (-426 to +28 bp)                         | prostate                      | neuroendocrine tumor                      | immunohistology (SYP)                                                                   | Chiaverotti et al. 2008                     |
| 12T-10-SV40 TAg                          | rat <i>Pbsn</i> (-11,500 to +28 bp)                      | prostate                      | neuroendocrine tumor, adenocarcinoma      | immunohistology (CGHA)                                                                  | Masumori et al. 2001                        |
| ITF-SV40 TAg                             | mouse <i>TFF3/ITF</i> (-1,190 to +59)                    | proximal colon                | neuroendocrine tumor                      | immunohistology (SYP)                                                                   | Gum et al. 2004                             |
| RIP1-Tag2                                | rat <i>Ins2</i>                                          | prostate                      | neuroendocrine tumor                      | transcriptome analysis (Gcg, Chga, Chgb, Scg2, Sct) <sup>1</sup>                        | Hanahan 1985; Djokovic et al. 2010          |
| I-FABP <sup>-1178 to +28</sup> -SV40 TAg | rat <i>Fabp2/I-FABP</i> (-1178 to +28)                   | proximal colon (submucosal)   | neuroendocrine tumor                      | electron microscopy                                                                     | Kim et al. 1993                             |
| GLU-SV40 TAg                             | rat <i>Ggn</i> (2.1 kb)                                  | colon, pancreas               | endocrine tumor                           | electron microscopy; immunohistology (PYY, GGN)                                         | Lee et al. 1992; Asa et al. 1996            |
| Gy/T-15-SV40 TAg                         | human <i>fetal Gy globin</i> (4 kb)                      | prostate                      | neuroendocrine tumor, epithelial tumor    | immunohistology (CGHA, KRT8)                                                            | Perez-Stable et al. 1997                    |
| ATP4b-SV40 TAg                           | murine <i>ATP4b</i> (-1,035 to +24)                      | stomach                       | neuroendocrine tumor                      | transcriptome analysis; electron microscopy; immunohistology (CGHA, DDC)                | Syder et al. 2004                           |
| PYY-SV40 TAg                             | rat <i>PYY</i> (2.8 kb)                                  | colon                         | endocrine tumor                           | immunohistology (SCT, GCG, gastrin, neurotensin, serotonin)                             | Upchurch et al. 1996                        |
| <i>non-endocrine tumors</i>              |                                                          |                               |                                           |                                                                                         |                                             |
| Misiir-SV40 TAg                          | mouse <i>Amhr2/Misiir</i>                                | ovaries                       | carcinoma, poorly differentiated          | Immunohistology (SYP, KRT8, KRT19)                                                      | Connolly et al. 2003                        |
| C3(1)-SV40 TAg                           | rat <i>Psbpc1/C3(1)</i> (5 kb)                           | mammary gland<br>prostate     | adenocarcinoma                            |                                                                                         | Maroulakou et al. 1994                      |
| TRP-1-SV40 TAg                           | <i>Tyrp1</i> (1.4 kb)                                    | eye                           | epithelial tumor                          | Immunohistology (TYRP1, TYR, KRT)                                                       | Penna et al. 1998                           |
| Tyr-SV40 TAg                             | mouse <i>Tyr</i> (338 bp)                                | eye                           | melanoma (choroidal)                      | Immunohistology (S-100, gp100)                                                          | Syed et al. 1998                            |
| WAP-SV40 TAg                             | mouse <i>Wap</i> (1.4 kb)                                | mammary gland                 | adenocarcinoma                            | Immunohistology (KRT8, KRT18)                                                           | Tzeng et al. 1993; Schulze-Garg et al. 2000 |
| SP-C-Sv40 TAg                            | huma <i>SFTPC</i> (3,683 to +18)                         | lung                          | adenocarcinoma                            |                                                                                         | Wikenheiser et al. 1992                     |

<sup>1</sup> Data obtained from <http://www.ncbi.nlm.nih.gov/geo/query/acc.cgi?acc=GSE24603>
